# Supplementary material
Source: ML conference proceedings conference paper supplement (https://openreview.net/forum?id=A3vDXf4PUO)
Supplement: supplementary_material [file full_paper_with_appendix.pdf › CGMT-LLR/full_paper_with_appendix.pdf]

---

# Thumb on the Scale: Optimal Loss Weighting in Last Layer Retraining

---

Anonymous Author(s)

Affiliation

Address

email

## Abstract

1 While machine learning models become more capable in discriminative tasks at  
2 scale, their ability to overcome biases introduced by training data has come under  
3 increasing scrutiny. Previous results suggest that there are two extremes of param-  
4 eterization with very different behaviors: the population (underparameterized) set-  
5 ting where loss weighting is optimal and the separable overparameterized setting  
6 where loss weighting is ineffective at ensuring equal performance across classes.  
7 This work explores the regime of last layer retraining (LLR) in which the unseen  
8 limited (retraining) data is frequently inseparable and the model proportionately  
9 sized, falling between the two aforementioned extremes. We show, in theory and  
10 practice, that loss weighting is still effective in this regime, but that these weights  
11 *must* take into account the relative overparameterization of the model.

## 12 1 Introduction

13 While discriminative machine learning has produced exceptional predictive power in many settings,  
14 even the most expressive models have struggled to balance the accuracy of common (majority)  
15 classes and rare (minority) classes. This comes as the most critical tasks, such as disease predic-  
16 tion, fraud detection, and rare event monitoring are fundamentally extremely imbalanced. It has,  
17 therefore, become critical to correct the existing majority bias even in the age of highly expressive,  
18 overparameterized models.

19 Substantial research has gone into studying methods for correcting models for their majority bias,  
20 and the most successful lines of research have been driven by the idea of last layer retraining  
21 (LLR) [1, 2] By updating only the final linear layer of a large model, the number of parameters  
22 to train is greatly reduced while still providing the flexibility to balance the accuracy for minor-  
23 ity classes. In this setting, a variety of cost-sensitive methods have been investigated, including  
24 weighted empirical risk minimization (wERM) sometimes called importance weighting [3], down-  
25 sampling [4, 3], and other corrected losses [5–10]. Each of these methods has shown compelling  
26 empirical success in the LLR setting, improving the accuracy of minority classes or groups to match  
27 that of majority groups. Despite this, theoretical and empirical evidence has shown that, for over-  
28 parameterized models, wERM has no effect on the learned model whatsoever [11, 12]. How do we  
29 reconcile this seeming contradiction when we are correcting large models?

30 Last layer retraining is often characterized by two quantities, the latent data dimension  $d$  (in-  
31 put to the last layer) and the number of retraining samples  $n$ . The overparameterization ratio  
32  $\delta \triangleq d/n \in (0, \infty)$  has been used to breakdown the performance of the above-mentioned meth-  
33 ods into two critical regimes: the populations setting ( $\delta \rightarrow 0$ ) and the overparameterized setting  
34 ( $\delta > 1$ ). For example, in the population setting, the methods described above for LLR have demon-  
35 strated both empirical and theoretical success in the population regime [3]. On the other hand, only  
36 downsampling and CS-SVM have been successful in improving minority class accuracy when the

model is highly overparameterized, i.e.,  $\delta > 1$ , and can separate the data [4, 9, 10]. In this work, we consider the ratio  $\delta$  in the understudied but highly relevant regime of  $\delta \in (0, 1)$ . This underparameterized regime is critical because, in practice, the number of samples is often on the same order as the number of parameters in the last layer retraining scenario.

In this underparameterized regime, we study the problem of obtaining loss weights which minimize worst-class error (WCE) for binary classification. Our key contributions in this setting are as follows:

- We simplify the wERM optimization with any loss on a sample from a class-conditional Gaussian distribution to a general system of four scalar equations for the setting where both  $d, n \rightarrow \infty$
- For the setting above and the choice of square loss, we derive optimal asymptotic weighting as a function of the overparameterization ratio  $\delta$ .
- We compare this optimal weighting scheme to downsampling and show that optimal wERM outperforms downsampling, especially when data is limited.
- Finally, we show that the trends described for simple Gaussian data in theory appear in real-world image classification problems and that our optimal weighting scheme can outperform the classical ratio of priors by leveraging the notion of an effective (latent) dimension.

## 1.1 Related Work

**Importance Weighting in Separable Settings** While wERM has been successful in practice, its applicability in high-dimensional problems has been called into question. Soudry et al. [13], Ji and Telgarsky [14], Gunasekar et al. [15] explore implicit bias of gradient descent-type methods on linear models and characterize the limiting model for a variety of loss families, including square and logistic losses. Xu et al. [16] explicitly consider loss weighting in the implicit bias and find that importance weighting on common losses does not alter the learned model, but can improve the convergence rate in imbalanced settings. Byrd and Lipton [11], Sagawa et al. [17] explore the problem of importance weighting with a focus on deep models and find that larger models are less affected by loss weighting than smaller models.

**Overparameterized Learning** Kini et al. [9], Behnia et al. [18] study CS-SVM in the overparameterized regime and show that in this setting the ineffectiveness of loss weighting can be overcome by considering an altered loss, namely the vector scaling loss. Their theoretical results help to explain important behaviors for  $\delta > 1$ . Lyu et al. [8] study a similar loss for  $\delta > 0$  and find that even when  $\delta < 1$ , the margin-scaled loss can be helpful for mitigating model biases. Lai and Muthukumar [10] study margin-adjusted minimum norm interpolation in the overparameterized regime and show that this can help to mitigate poor out-of-distribution generalization. Our work instead considers loss weighting (as opposed to margin weighting) in the underparameterized regime.

**Downsampling** Chaudhuri et al. [4] study downsampling in the context of separable SVM and work with fixed  $d$  while scaling up the class means as  $n \rightarrow \infty$ . Their work utilizes extreme value theory and finds that downsampling can improve WCE for several data distributions. Several works empirically utilize downsampling in the LLR setting to improve subgroup fairness including Kirichenko et al. [1], LaBonte et al. [19], Stromberg et al. [20]. Our work focuses weighted learning on inseparable data and the proportional regime of  $\delta \in (0, 1)$ .

**Population Risk Minimization** In the population setting, Welfert et al. [3] study wERM, downsampling, and MixUp. They show that the first two are equivalent problems, and that all three result in the same solution given  $n \rightarrow \infty$ . We instead focus on both  $d, n \rightarrow \infty$  at a fixed ratio which can better explain practical settings like LLR where the number of data points and the number of trainable parameters are on the same order.

## 2 Problem Setup

We denote deterministic vectors as  $\underline{x}$  and their random counterparts as  $\underline{X}$ . Matrices are denoted  $\underline{X}$  and their randomness is clear by context. We begin by defining the generative model and key functions of interest.

## 85 2.1 Data and Metrics

86 We assume the following generative model for the latent data  $\underline{X}$  and label  $Y$ :

$$Y \sim \begin{cases} -1 & \text{w.p. } \pi_- \\ 1 & \text{w.p. } \pi_+ \end{cases}$$

$$\underline{X}|(Y = y) \sim \mathcal{N}(y\mu, \mathbf{I})$$

87 with  $\mu \in \mathbb{R}^d$  and  $\mathbf{I} \in \mathbb{R}^{d \times d}$  the identity matrix. Without loss of generality, we assume that  $\pi_+ < \pi_-$   
88 so +1 is the minority class. Assume we get  $n$  samples as  $(\mathbf{X}, y) \in \mathbb{R}^{n \times d} \times \mathbb{R}^n$  following the above  
89 distribution.

90 The key metric studied in this work is worst-class error (WCE) which provides a notion of fairness  
91 for a given classifier. We can calculate the expected risk (error) on each class for a given linear  
92 model  $(\underline{\theta}, b)$  as follows:

$$\mathcal{R}_+ \triangleq Q\left(\frac{\gamma s}{\alpha} + \frac{b}{\alpha}\right), \quad \mathcal{R}_- \triangleq Q\left(\frac{\gamma s}{\alpha} - \frac{b}{\alpha}\right), \quad (1)$$

93 where  $s \triangleq \|\mu\| \in \mathbb{R}$  is the signal strength,  $\gamma \triangleq \frac{\mu^\top \underline{\theta}}{\|\mu\|} \in \mathbb{R}$  is the energy of  $\underline{\theta}$  along  $\mu$ ,  $\alpha \triangleq$   
94  $\|\underline{\theta}\| \in \mathbb{R}$  is the total energy of  $\underline{\theta}$ , and  $Q(\cdot)$  is the standard  $Q$ -function. More details can be found in  
95 Appendix A.1. These three scalar quantities and the bias will be the focus of our analysis.

96 We can then calculate WCE as follows:

$$\text{WCE}(\underline{\theta}, b) \triangleq \max\{\mathcal{R}_+, \mathcal{R}_-\} \quad (2)$$

97 In the sequel, we will make use the following function class: the Moreau envelope of a function  $f$   
98 is parameterized by  $\lambda$  and defined as

$$\mathcal{M}_f(x; \lambda) \triangleq \inf_v f(v) + \frac{1}{2\lambda} \|v - x\|_2^2 \quad (3)$$

99 and can be thought of as a locally smoothed version of  $f$ . It is always continuously differentiable  
100 with respect to  $x$  and  $\lambda$ . The  $v$  that achieves the infimum above is given by the prox operator. We  
101 will also make use of the partial derivatives of  $\mathcal{M}$  which we denote as  $\mathcal{M}'_{\ell,1}(x; \lambda)$  and  $\mathcal{M}'_{\ell,2}(x; \lambda)$   
102 for the partials with respect to the first and second arguments respectively. The second derivatives  
103 are denoted similarly. See Appendix A.3 for a full definition.

## 104 3 Asymptotic Analysis of Cost-Sensitive Last Layer Methods

105 We will now discuss our key theoretical results for both weighted and downsampled ERM in the  
106 asymptotic setting where both  $d, n \rightarrow \infty$  such that  $\delta = d/n \in (0, 1)$ . Furthermore, we specialize in  
107 the analysis for square loss for which we can derive closed form solutions.

### 108 3.1 Weighted ERM

109 We consider the weighted ERM problem

$$\min_{\underline{\theta}, b} \frac{1}{n} \sum_{i=1}^n \omega_i \ell(y_i(\underline{x}_i^\top \underline{\theta} + b)) \quad (4)$$

110 where  $\ell$  is the margin-based loss function of interest and is only required to be convex in its argu-  
111 ment. We consider the special case of *class weighting* where, recalling that class +1 is the minority  
112 class, we have

$$\omega_i = \begin{cases} 1, & y_i = -1 \\ \rho, & y_i = +1. \end{cases} \quad (5)$$

113 Although weighting of groups or other subsets of the data fits into our framework, we focus on class  
114 weighting for clarity. We denote the solution to this problem by  $(\hat{\underline{\theta}}(\rho), \hat{b}(\rho))$ . Note that we can  
115 reparameterize this solution as  $(\hat{\alpha}(\rho), \hat{\gamma}(\rho), \hat{b}(\rho))$  with  $\alpha$  and  $\gamma$  defined as in section 2.1.

116 We begin by showing how this  $(d+1)$ -dimensional optimization can be reduced to the solution of a  
117 system of scalar equations.

118 **Theorem 1** (Weighted ERM Solution). *For  $\delta \in (0, 1)$  and a proper, convex loss  $\ell$ , (4) can be*  
 119 *effectively reduced to a four dimensional system of equations in  $\alpha, \gamma, \lambda, b$  given by*

$$\begin{aligned} & \delta(\alpha^2 - \gamma^2) + 2\lambda^2 \pi_+ \mathbb{E}[\mathcal{M}'_{\ell,2}(-\alpha G + s\gamma + b; \lambda)] \\ & + 2\lambda^2 / \rho^2 \pi_- \mathbb{E}[\mathcal{M}'_{\ell,2}(-\alpha G + s\gamma - b; \lambda/\rho)] = 0 \end{aligned} \quad (6a)$$

$$\begin{aligned} & \frac{\delta\gamma\rho}{\lambda} + \pi_+ \rho s \mathbb{E}[\mathcal{M}'_{\ell,1}(-\alpha G + s\gamma + b; \lambda)] \\ & + \pi_- s \mathbb{E}[\mathcal{M}'_{\ell,1}(-\alpha G + s\gamma - b; \lambda/\rho)] = 0 \end{aligned} \quad (6b)$$

$$\begin{aligned} & -\frac{\delta\alpha\rho}{\lambda} + \pi_+ \rho \alpha \mathbb{E}[\mathcal{M}''_{\ell,1}(-\alpha G + s\gamma + b; \lambda)] \\ & + \pi_- \alpha \mathbb{E}[\mathcal{M}''_{\ell,1}(-\alpha G + s\gamma - b; \lambda/\rho)] = 0 \end{aligned} \quad (6c)$$

$$\begin{aligned} & \pi_+ \rho \mathbb{E}[\mathcal{M}'_{\ell,1}(-\alpha G + s\gamma + b; \lambda)] \\ & - \pi_- \mathbb{E}[\mathcal{M}'_{\ell,1}(-\alpha G + s\gamma - b; \lambda/\rho)] = 0 \end{aligned} \quad (6d)$$

120 *with  $G \sim \mathcal{N}(0, 1)$ . Concretely, when the solution  $(\alpha^*, \gamma^*, \lambda^*, b^*)$  to this system of equations is*  
 121 *unique, then it satisfies  $(\hat{\alpha}, \hat{\gamma}, \hat{b}) \rightarrow (\alpha^*, \gamma^*, b^*)$  as  $n, d \rightarrow \infty$  and  $d/n = \delta$ .*

122 The proof is presented in Appendix A.4 and relies on the convex Gaussian minimax theorem  
 123 (CGMT) [21, 22] which is discussed in Appendix A.2 and further in [23].

124 The expected Moreau envelope of  $\ell$  can be estimated from samples, allowing the system in (6) to be  
 125 efficiently solved using numerical methods like fixed-point iteration. For square loss, however, the  
 126 Moreau envelope admits a closed form

$$\mathcal{M}_{\ell_{\text{square}}}(x; \lambda) = \frac{1}{2} \frac{(x-1)^2}{1+\lambda}, \quad (7)$$

127 allowing us to reduce the above system and remove the randomness.

128 **Corollary 1** (Square Loss). *Letting  $\ell(z) = \ell_{\text{square}}(z) \triangleq \frac{1}{2}(z-1)^2$ , we have the following set of*  
 129 *equations as a simplification of (6):*

$$\pi_+ \frac{\lambda^2}{(1+\lambda)^2} ((s\gamma + b - 1)^2 + \alpha^2) + \pi_- \frac{\lambda^2}{(\rho + \lambda)^2} ((s\gamma - b - 1)^2 + \alpha^2) = \delta(\alpha^2 - \gamma^2) \quad (8a)$$

$$\pi_+ s(s\gamma + b - 1) \frac{\lambda}{1+\lambda} + \pi_- s(s\gamma - b - 1) \frac{\lambda}{\rho + \lambda} = -\delta\gamma \quad (8b)$$

$$\pi_+ \frac{\lambda}{1+\lambda} + \pi_- \frac{\lambda}{\rho + \lambda} = \delta \quad (8c)$$

$$\pi_+ \frac{s\gamma + b - 1}{1+\lambda} - \pi_- \frac{s\gamma - b - 1}{\rho + \lambda} = 0 \quad (8d)$$

130 *Proof Sketch.* We use the closed form for the Moreau envelope of the square loss and evaluate all of  
 131 the expectations utilizing the known data distribution. A full proof is provided in Appendix A.5.  $\square$

132 While this system of equations is significantly simpler than that of (6), it still does not admit a  
 133 closed-form solution for general weighting. However, certain special cases including unweighted  
 134 ERM allow for a closed-form solution. Substituting  $\rho = 1$  in (8), we obtain the following corollary:

135 **Corollary 2** (Unweighted Solution). *Letting  $\rho = 1$ , we get the following solution to (8):*

$$\gamma^* = \frac{s(1 - (\pi_- - \pi_+)^2)}{1 + s^2(1 - (\pi_- - \pi_+)^2)} \quad (9a)$$

$$\lambda^* = \frac{\delta}{1 - \delta} \quad (9b)$$

$$b^* = (\pi_- - \pi_+)(\gamma^* s - 1) \quad (9c)$$

$$\alpha^* = \sqrt{\lambda^*(\pi_+(\gamma^* s + b^* - 1)^2 + \pi_-(\gamma^* s - b^* - 1)^2) + \frac{\gamma^{*2}}{1 - \delta}} \quad (9d)$$

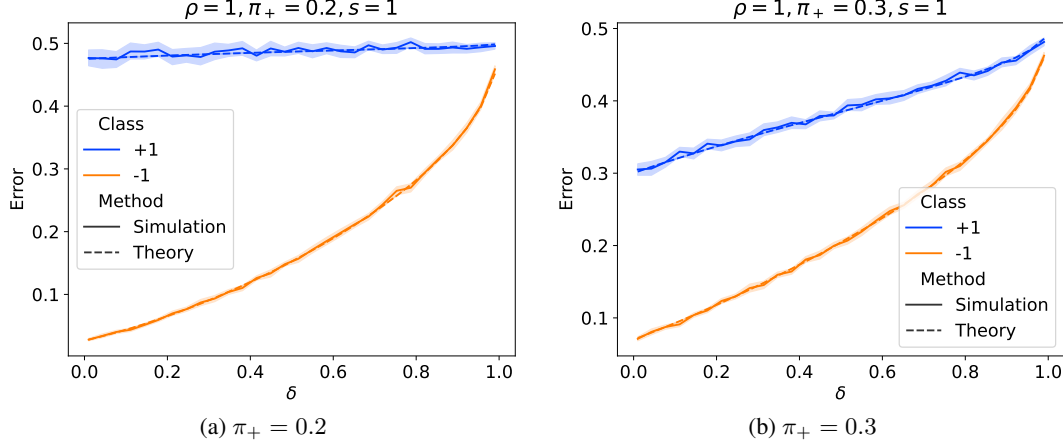

Figure 1: Plot of per-class test error as a function of  $\delta$  on a class-conditional Gaussian dataset. We see that simulation matches the theoretical closed form across all  $\delta$  values and different imbalances  $\pi_+$ . Both classes perform more poorly for growing overparameterization. The majority always outperforms the minority, however.

Similar results have appeared in the literature [24], and we include it here for completeness.

The solution in Corollary 2 captures the effect of overparameterization through  $\delta$ . We visualize this effect in Figure 1 where we also see that the small  $\delta$  regime strongly favors the majority whereas as  $\delta \rightarrow 1$ , the difference between classes dissipates (at the cost of increasing WCE). Its behavior as a function of  $\pi_+$  is shown in Figure 4.

An interesting case is when we want to equalize the error of each class. From (1), we obtain this by setting  $b = 0$ ; this, in turn, corresponds to choosing a specific  $\rho$  which yields  $b^* = 0$ . Starting from Corollary 1, we obtain the following result for the equal error settings.

**Theorem 2** (Equal Error Solution). *Assuming  $\delta < 2\pi_+$ , let  $\rho = \tilde{\rho}$  defined as*

$$\tilde{\rho} \triangleq \frac{\pi_-}{\pi_+} + \left( \frac{\pi_-}{\pi_+} - 1 \right) \frac{\delta}{2\pi_+ - \delta} \quad (10)$$

Then, the solution to (8) is given by

$$b^* = 0 \quad (11a)$$

$$\gamma^* = \frac{s}{1 + s^2} \quad (11b)$$

$$\alpha^* = \sqrt{\frac{\Delta}{1 - \Delta} (\gamma^* s - 1)^2 + \frac{\gamma^{*2}}{1 - \Delta}}, \quad (11c)$$

where we define  $\Delta := \frac{\delta}{4\pi_+} + \frac{\delta}{4\pi_-}$  for convenience. We can write the worst-class error of wERM using  $\tilde{\rho}$  and square loss as

$$Q \left( \frac{s^2 \sqrt{1 - \Delta}}{\sqrt{\Delta + s^2}} \right). \quad (12)$$

*Proof.* Substituting  $\tilde{\rho}$  into (8) we can solve for  $\lambda, \gamma, b, \alpha$ . To get the WCE we substitute into (1).  $\square$

We see that the form of  $\tilde{\rho}$  is the classical ratio of priors plus an offset that depends only on the overparameterization ratio  $\delta$  and the minority prior  $\pi_+$ . Note that this offset is 0 for balanced classes regardless of parameterization.

We see in Figure 2 that  $\tilde{\rho}$  aligns with the crossover of the per-class errors in theory and in simulation of a class-conditional Gaussian with  $s = 2, \delta = 0.2$ , and  $\pi_+ = 0.2$ . Additionally, we see the monotonicity required by Theorem 3. This results in  $\tilde{\rho}$  (red) strongly outperforming the population-optimal weighting marked in black. This suggests that using a stronger weight should be helpful in practical settings where  $d$  and  $n$  are on similar scales. We explore this further in section 4.

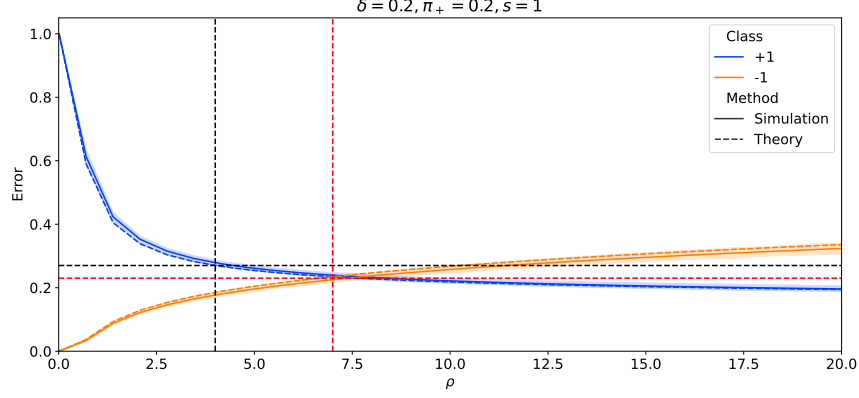

Figure 2: Per-class test error plotted against the weight ratio  $\rho$  on a synthetic dataset. We see that not only does our theoretical formulation match the simulation results,  $\tilde{\rho}$  (red) strongly outperforms the conventional ratio of priors (black). Note that the worst-class error for each weighting scheme is marked with a horizontal line.

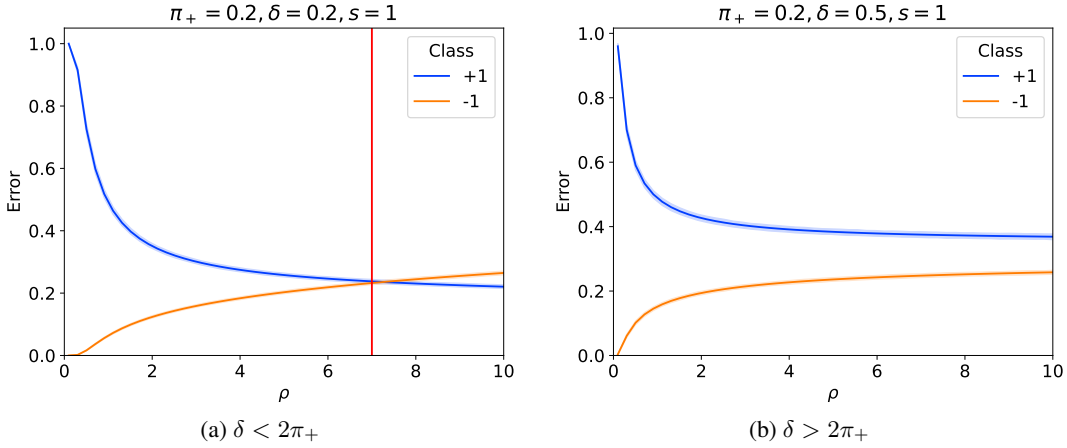

Figure 3: Effect of  $\rho$  on the per-class test error on a synthetic dataset. We see the restriction for  $\delta < 2\pi_+$  for  $\tilde{\rho}$  (red) to be defined has an operational meaning regarding the per-class errors. Indeed if  $\delta > 2\pi_+$ , the per-class errors never meet and thus cannot be balanced.

157 It is worth noting that this  $\tilde{\rho}$  for WCE does not align with the conventional wisdom of the ratio of  
 158 the priors except as  $\delta \rightarrow 0$ , which is the case that  $n \rightarrow \infty$  for a fixed  $d$ . This aligns with previous  
 159 population results such as [3]. We compare the ratio of the priors to  $\tilde{\rho}$  in Figure 2 and indeed see  
 160 that the ratio of the priors is suboptimal for this  $\delta > 0$ .

161 We additionally see in Theorem 2 that the solution  $\tilde{\rho}$  is only valid in the setting that  $\delta < 2\pi_+$ . This  
 162 is an interesting restriction, as it suggests that overparameterization affects the ability of weighting  
 163 to correct for class imbalances. Indeed we see in Figure 3b that when  $\delta > 2\pi_+$ , the two per-class  
 164 risks never intersect as a function of  $\rho$ , and thus the WCE is dominated only by the minority class.  
 165 In this setting, the optimal choice of weighting is  $\rho \rightarrow \infty$ .

166 With the assumption that the per-class risks are monotonic in  $\rho$  (which holds in our simulations),  
 167 this choice of  $\rho$  is optimal in terms of WCE. While the assumption above may seem strong, it is  
 168 intuitive that increasing the weight on a class should decrease the risk for that class and increase the  
 169 risk for the opposite class.

170 **Theorem 3** (Optimality of  $\tilde{\rho}$ ). Assume that  $\mathcal{R}_+$  and  $\mathcal{R}_-$  are monotonically decreasing and increas-  
 171 ing respectively in the weight parameter  $\rho$ . Then  $\tilde{\rho}$  minimizes WCE over all choices of  $\rho$  for a given  
 172  $\mu$  and  $\delta < 2\pi_+$ .

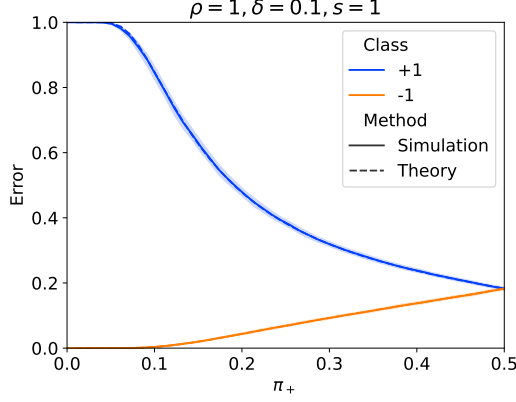

Figure 4: Per-class errors for unweighted ERM. We first note that simulation using SGD matches the theoretical risk across all  $\pi_+$  values. The effect of imbalance is quite extreme and the minority error quickly skyrockets.

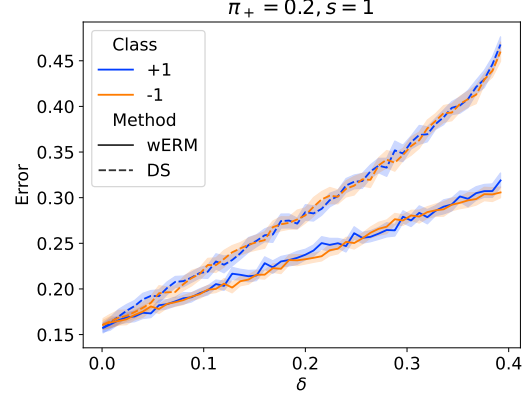

Figure 5: A comparison of wERM using the optimal weight  $\tilde{\rho}$  and downsampling. We see that for a fixed  $\delta$ , the error for wERM is much lower than that of downsampling but that both achieve balanced per-class errors.

173 *Proof.* For convenience, we overload WCE to be a function of weight  $\rho$  directly. If both per-class  
 174 risks are monotonic in  $\rho$ , WCE is a quasiconvex function in  $\rho$  as it is the maximum of two monotonic  
 175 functions. The choice of  $\tilde{\rho}$  is a local minima of WCE as for any  $\epsilon > 0$ ,  $\text{WCE}(\tilde{\rho} + \epsilon) \geq \text{WCE}(\tilde{\rho})$  as  
 176  $\mathcal{R}_-$  is increasing and  $\text{WCE}(\tilde{\rho} - \epsilon) \geq \text{WCE}(\tilde{\rho})$  because  $\mathcal{R}_+$  is decreasing. Thus  $\tilde{\rho}$  is a global minima  
 177 of WCE by quasiconvexity.  $\square$

### 178 3.2 Downsampled ERM

179 While upweighting is one common form of cost-sensitive correction during LLR, another is down-  
 180 sampling. We specifically consider the variant of downsampling where the majority class is down-  
 181 sampled to the size of the minority class. We can adapt our existing results to capture the downsam-  
 182 pling problem as a change of  $n$  (therefore  $\delta$ ) and priors.

183 **Corollary 3** (Downsampling). *The solution to the downsampled problem is given by taking  $\tilde{\delta} \triangleq \frac{\delta}{2\pi_+}$   
 184 for  $\delta$  in Theorem 1 and setting  $\pi_+ = \pi_- = \frac{1}{2}$  and  $\rho = 1$ . For square loss, the closed form follows  
 185 from Corollary 2.*

186 We see an illustration of the relative strengths of these methods in Figure 5 which shows that the  
 187 increased effective overparameterization for downsampling results in much higher error for both  
 188 classes. Note that as  $\delta$  approaches 0, the two methods perform equally. This aligns with the the-  
 189 ory of cost-sensitive population risk minimization [3]. The increasing gap between wERM and  
 190 downsampling is indicative of the strength of wERM as overparameterization increases. This is  
 191 particularly important for highly imbalanced datasets as the effective overparameterization used in  
 192 downsampling grows as  $\frac{1}{\pi_+}$ .

## 193 4 Application to Imbalanced Image Classification

194 We have presented a theoretical framework for understanding how overparameterization affects the  
 195 cost-sensitive learning methodologies, and we next explore this effect in practice for binary image  
 196 classification tasks. Additional plots can be found in Appendix B. All relevant hyperparameters are  
 197 discussed in Appendix C.

198 We consider the CelebA [25] dataset which consists of images of celebrity faces, each marked with  
 199 40 binary attributes. We select Straight Hair as the attribute of interest with takes the value 1 in  
 200 21% of samples and the value 0 in 79% of samples. We also consider a binary version of CIFAR10  
 201 [26] with artificial imbalance, where class  $-1$  is truck with 91% of the data and  $+1$  is airplane  
 202 with 9% of the data. We consider other classes and imbalance ratios within CIFAR10 in Appendix B  
 203 and find qualitatively similar behavior.

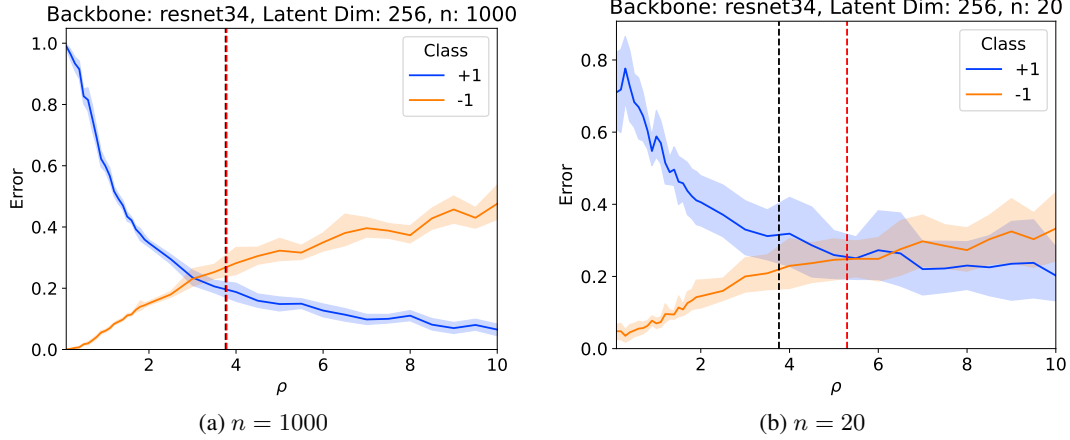

Figure 6: Per-class accuracies for binary hair texture classification on the CelebA dataset, with the classical ratio of the priors  $\rho$  marked in black and our  $\tilde{\rho}$  in red. We see that the number of samples (thus  $\delta$ ) affects the empirically optimal weighting, with larger  $\delta$  requiring a larger weight on the minority class. This aligns with the theoretical results of Theorem 2.

We finetune a ResNet34 model on the training split of each dataset using cross entropy loss before retraining the final layer with varying  $\rho$  on the validation split with square loss (aligning with theory). The focus on square loss may seem like a major restriction, but in practice, square loss is often as performant as cross entropy loss, especially in the low-data fine-tuning setting [27, 28]. To simulate different  $\delta$  values, since the model size is fixed for LLR, we subsample the validation data uniformly to size  $n$ . For each  $n$ , this retraining is repeated 10 times with different subsamples to get confidence intervals on the captured metrics. We note that CIFAR10 does not provide a validation split, so we create one from fixed 10% split of the test data. For this reason, we only consider up to  $n = 90$  for CIFAR10.

We note that while we choose the size of the latent space, this is not the  $d$  that is used for calculating  $\delta$ . We observe in practice that the majority of the features in the latent space are irrelevant (see Figure 9 in Appendix B for PCA spectra). As such, we perform PCA to quantify the number of “effective” dimensions in the data as the number of features which capture 99% of the variance. This is 3 dimensions for CelebA and 2 for CIFAR10. In general, the number of effective dimensions will be a function of task difficulty and model architecture. The relatively poor usage of the latent space is a core observation of Kirichenko et al. [1] and motivates sparse LLR. Here, we quantify the level of sparsity to better select importance weights.

We see in Figure 6 that while the  $\tilde{\rho}$  calculated using the effective dimension does not perfectly predict the optimal empirical  $\rho$ , it captures the correct behavior as  $n$  shrinks (and therefore  $\delta$  increases). Note that for  $n = 1000$ , the population-optimal weights are not empirically optimal, likely due to a small shift from the validation data to the test data or inadequate model generalization. For  $n = 20$ ,  $\tilde{\rho}$  is distinctly larger than the ratio of the priors and achieves much better WCE.

In Figure 7, for the CIFAR10 dataset, we see that  $\tilde{\rho}$  calculated from the effective latent dimension (red) predicts the empirical optimal  $\rho$  quite well, and is certainly better in terms of WCE than the classical ratio of the priors (black). While there is significant noise with only  $n = 20$  retraining samples (so only 1 or 2 minority examples), weighting with  $\tilde{\rho}$  allows us to recover a more balanced classifier.

Ultimately, we see that the optimal weighting scheme is effective across different datasets and over-parameterization levels, including other choices of class for CIFAR10 (see Appendix B). This suggests that our method is quite general and could be useful in practice, acting as a default weighting rather than the classical ratio of the priors.



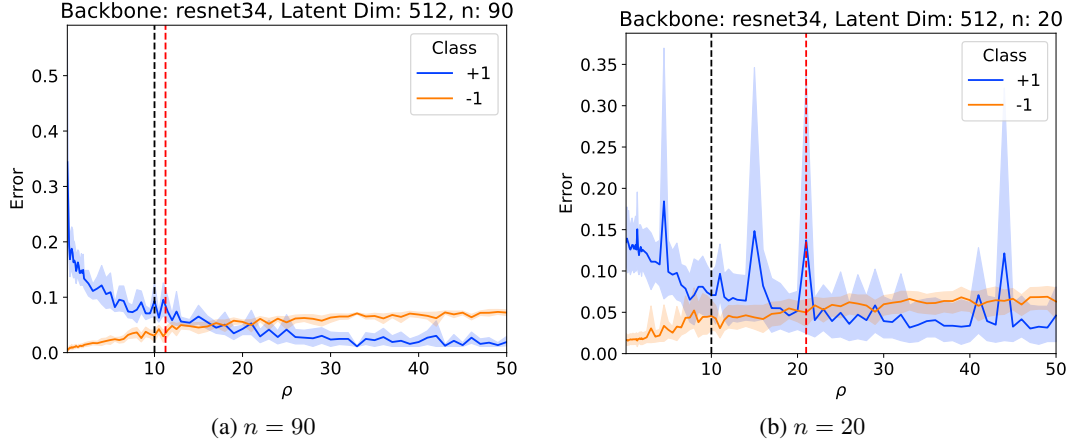

Figure 7: Per-class accuracies for binary classification on the CIFAR10 dataset (planes vs trucks), with the classical ratio of the priors  $\rho$  marked in black and our  $\tilde{\rho}$  in red. We see that the number of samples (thus  $\delta$ ) affects the empirically optimal weighting, with larger  $\delta$  requiring a larger weight on the minority class. This aligns with the theoretical results of Theorem 2.

## 5 Limitations and Broader Impacts

**Limitations** While it is common to assume that the latent space of a deep model is Gaussian, a more sophisticated mixture could be useful in explaining class-imbalanced learning under spurious correlation or related settings. Our analysis is also limited to isotropic noise, but we hope to extend this in future works. Despite these assumptions in the analysis, we see that in real datasets, where neither of these hold, the derived  $\tilde{\rho}$  can still be useful in selecting an appropriate weighting during last layer retraining.

While our provided analysis is able to effectively capture the behavior of real models under last layer retraining with square loss, providing a clear prescription for weighting depends on the “effective” dimension of the latent data. We utilize PCA, but this is rather heuristic. A weighting methodology which learns this effective dimension in a more principled manner could increase the practical application of our findings and is a major focus of our future work.

**Broader impacts** There is ongoing discussion about whether improving the performance of minority classes at the expense of majority classes is desirable. However, in critical applications such as disease or rare event detection, our weighting scheme could result in significant gains on rare classes which often have an outsized real-world impact.

## 6 Conclusion

In this work, we have demonstrated the efficacy of loss weighting in the last layer retraining setting and derived an optimal weighting scheme which takes into account overparameterization. Our results close a wide gap in the literature between the population (many samples) setting and the overparameterized (few samples) setting and provide new insights into this highly relevant regime.

In practice, we show that this novel weighting scheme outperforms the classical ratio of priors in vision tasks, but that a different notion of dimension needs to be taken into account. This compensates for the fact that many dimensions of the last layer of large models go unused, a core observation of previous works. Our prescription for loss weighting is general in that it outperforms the ratio of the priors across datasets, latent dimensions, and imbalance ratios in real-world settings. Our findings not only challenge the assumption that the classical ratio of priors is optimal but also provides a pathway towards more balanced model retraining by leveraging this effective dimension. We believe these insights will extend the benefits of optimal loss weighting to more complex real-world fine-tuning applications.

## References

- [1] Polina Kirichenko, Pavel Izmailov, and Andrew Gordon Wilson. Last Layer Re-Training is Sufficient for Robustness to Spurious Correlations. In *The Eleventh International Conference on Learning Representations*, 2023. URL <https://openreview.net/forum?id=Zb6c8A-Fghk>.
- [2] Pavel Izmailov, Polina Kirichenko, Nate Gruver, and Andrew Gordon Wilson. On Feature Learning in the Presence of Spurious Correlations, October 2022. URL <http://arxiv.org/abs/2210.11369>. arXiv:2210.11369 [cs].
- [3] Monica Welfert, Nathan Stromberg, and Lalitha Sankar. Theoretical guarantees of data augmented last layer retraining methods. In *2024 IEEE International Symposium on Information Theory (ISIT)*, pages 581–586. IEEE, 2024.
- [4] Kamalika Chaudhuri, Kartik Ahuja, Martin Arjovsky, and David Lopez-Paz. Why does throwing away data improve worst-group error? In Andreas Krause, Emma Brunskill, Kyunghyun Cho, Barbara Engelhardt, Sivan Sabato, and Jonathan Scarlett, editors, *Proceedings of the 40th International Conference on Machine Learning*, volume 202 of *Proceedings of Machine Learning Research*, pages 4144–4188. PMLR, 23–29 Jul 2023.
- [5] Aditya Krishna Menon, Sadeep Jayasumana, Ankit Singh Rawat, Himanshu Jain, Andreas Veit, and Sanjiv Kumar. Long-tail learning via logit adjustment, July 2021. URL <http://arxiv.org/abs/2007.07314>. arXiv:2007.07314 [cs, stat].
- [6] Kaidi Cao, Colin Wei, Adrien Gaidon, Nikos Archiga, and Tengyu Ma. Learning Imbalanced Datasets with Label-Distribution-Aware Margin Loss, October 2019. URL <http://arxiv.org/abs/1906.07413>. arXiv:1906.07413 [cs, stat].
- [7] Haotian Ye, Chuanlong Xie, Tianle Cai, Ruichen Li, Zhenguo Li, and Liwei Wang. Towards a Theoretical Framework of Out-of-Distribution Generalization. November 2021. URL <https://openreview.net/forum?id=kFJo7zuDVi>.
- [8] Jingyang Lyu, Kangjie Zhou, and Yiqiao Zhong. A statistical theory of overfitting for imbalanced classification, February 2025. URL <http://arxiv.org/abs/2502.11323>. arXiv:2502.11323 [math].
- [9] Ganesh Ramachandra Kini, Orestis Paraskevas, Samet Oymak, and Christos Thrampoulidis. Label-imbalanced and group-sensitive classification under overparameterization. *Advances in Neural Information Processing Systems*, 34:18970–18983, 2021.
- [10] Kuo-Wei Lai and Vidya Muthukumar. Sharp analysis of out-of-distribution error for “importance-weighted” estimators in the overparameterized regime. In *2024 IEEE International Symposium on Information Theory (ISIT)*, pages 3701–3706, 2024. doi: 10.1109/ISIT57864.2024.10619252.
- [11] Jonathon Byrd and Zachary Lipton. What is the effect of importance weighting in deep learning? In Kamalika Chaudhuri and Ruslan Salakhutdinov, editors, *Proceedings of the 36th International Conference on Machine Learning*, volume 97 of *Proceedings of Machine Learning Research*, pages 872–881. PMLR, 09–15 Jun 2019.
- [12] Da Xu, Yuting Ye, and Chuanwei Ruan. Understanding the role of importance weighting for deep learning. In *International Conference on Learning Representations*, 2021.
- [13] Daniel Soudry, Elad Hoffer, Mor Shpigel Nacson, Suriya Gunasekar, and Nathan Srebro. The implicit bias of gradient descent on separable data. *The Journal of Machine Learning Research*, 19(1):2822–2878, January 2018. ISSN 1532-4435.
- [14] Ziwei Ji and Matus Telgarsky. The implicit bias of gradient descent on nonseparable data. In *Proceedings of the Thirty-Second Conference on Learning Theory*, pages 1772–1798. PMLR, June 2019. URL <https://proceedings.mlr.press/v99/ji19a.html>. ISSN: 2640-3498.
- [15] Suriya Gunasekar, Jason Lee, Daniel Soudry, and Nathan Srebro. Characterizing Implicit Bias in Terms of Optimization Geometry. In *Proceedings of the 35th International Conference on Machine Learning*, pages 1832–1841. PMLR, July 2018. URL <https://proceedings.mlr.press/v80/gunasekar18a.html>. ISSN: 2640-3498.
- [16] Da Xu, Yuting Ye, and Chuanwei Ruan. Understanding the role of importance weighting for deep learning, March 2021. URL <http://arxiv.org/abs/2103.15209>. arXiv:2103.15209 [cs].
- [17] Shiori Sagawa, Aditi Raghunathan, Pang Wei Koh, and Percy Liang. An Investigation of Why Overparameterization Exacerbates Spurious Correlations, 2020. URL <https://arxiv.org/abs/2005.04345>.

- 317 [18] Tina Behnia, Ke Wang, and Christos Thrampoulidis. On how to avoid exacerbating spurious correlations when models are overparameterized, June 2022. URL <http://arxiv.org/abs/2206.12739>.  
318 arXiv:2206.12739 [cs].  
319
- 320 [19] Tyler LaBonte, Vidya Muthukumar, and Abhishek Kumar. Towards last-layer retraining for group robust-  
321 ness with fewer annotations. In *Thirty-seventh Conference on Neural Information Processing Systems*,  
322 2023.
- 323 [20] Nathan Stromberg, Rohan Ayyagari, Monica Welfert, Sanmi Koyejo, Richard Nock, and Lalitha Sankar.  
324 For robust worst-group accuracy, ignore group annotations. *Transactions on Machine Learning Research*,  
325 2024. ISSN 2835-8856.
- 326 [21] Mihailo Stojnic. A framework to characterize performance of LASSO algorithms, March 2013. URL  
327 <http://arxiv.org/abs/1303.7291>. arXiv:1303.7291 [cs].
- 328 [22] Christos Thrampoulidis, Samet Oymak, and Babak Hassibi. Regularized Linear Regression: A Precise  
329 Analysis of the Estimation Error. In *Proceedings of The 28th Conference on Learning Theory*, pages  
330 1683–1709. PMLR, June 2015. URL [https://proceedings.mlr.press/v40/Thrampoulidis15](https://proceedings.mlr.press/v40/Thrampoulidis15.html).  
331 html. ISSN: 1938-7228.
- 332 [23] Christos Thrampoulidis, Ehsan Abbasi, and Babak Hassibi. Precise error analysis of regularized  $m$ -  
333 estimators in high dimensions. *IEEE Transactions on Information Theory*, 64(8):5592–5628, 2018.
- 334 [24] Francesca Mignacco, Florent Krzakala, Yue Lu, Pierfrancesco Urbani, and Lenka Zdeborova. The Role  
335 of Regularization in Classification of High-dimensional Noisy Gaussian Mixture. In *Proceedings of the*  
336 *37th International Conference on Machine Learning*, pages 6874–6883. PMLR, November 2020. URL  
337 <https://proceedings.mlr.press/v119/mignacco20a.html>. ISSN: 2640-3498.
- 338 [25] Ziwei Liu, Ping Luo, Xiaogang Wang, and Xiaoou Tang. Deep learning face attributes in the wild. In  
339 *Proceedings of International Conference on Computer Vision (ICCV)*, December 2015.
- 340 [26] Alex Krizhevsky and Geoffrey Hinton. Learning multiple layers of features from tiny images. Technical  
341 Report 0, University of Toronto, Toronto, Ontario, 2009. URL <https://www.cs.toronto.edu/~kriz/learning-features-2009-TR.pdf>.  
342
- 343 [27] L Hui. Evaluation of neural architectures trained with square loss vs cross-entropy in classification tasks.  
344 In *The Ninth International Conference on Learning Representations (ICLR 2021)*, 2020.
- 345 [28] Alessandro Achille, Aditya Golatkar, Avinash Ravichandran, Marzia Polito, and Stefano Soatto. LQF:  
346 Linear Quadratic Fine-Tuning. In *2021 IEEE/CVF Conference on Computer Vision and Pattern Recognition (CVPR)*, pages 15724–15734, Los Alamitos, CA, USA, June 2021. IEEE Computer Society. doi:  
347 10.1109/CVPR46437.2021.01547.  
348
- 349 [29] Hossein Taheri, Ramtin Pedarsani, and Christos Thrampoulidis. Sharp Asymptotics and Optimal Perfor-  
350 mance for Inference in Binary Models, February 2020. URL <http://arxiv.org/abs/2002.07284>.  
351 arXiv:2002.07284 [math].

## NeurIPS Paper Checklist

### 1. Claims

Question: Do the main claims made in the abstract and introduction accurately reflect the paper's contributions and scope?

Answer: [\[Yes\]](#)

Justification: We demonstrate theoretically and empirically the dependence of optimal loss weighting on the level of underparameterization of the model.

Guidelines:

- The answer NA means that the abstract and introduction do not include the claims made in the paper.
- The abstract and/or introduction should clearly state the claims made, including the contributions made in the paper and important assumptions and limitations. A No or NA answer to this question will not be perceived well by the reviewers.
- The claims made should match theoretical and experimental results, and reflect how much the results can be expected to generalize to other settings.
- It is fine to include aspirational goals as motivation as long as it is clear that these goals are not attained by the paper.

### 2. Limitations

Question: Does the paper discuss the limitations of the work performed by the authors?

Answer: [\[Yes\]](#)

Justification: A limitations section is included.

Guidelines:

- The answer NA means that the paper has no limitation while the answer No means that the paper has limitations, but those are not discussed in the paper.
- The authors are encouraged to create a separate "Limitations" section in their paper.
- The paper should point out any strong assumptions and how robust the results are to violations of these assumptions (e.g., independence assumptions, noiseless settings, model well-specification, asymptotic approximations only holding locally). The authors should reflect on how these assumptions might be violated in practice and what the implications would be.
- The authors should reflect on the scope of the claims made, e.g., if the approach was only tested on a few datasets or with a few runs. In general, empirical results often depend on implicit assumptions, which should be articulated.
- The authors should reflect on the factors that influence the performance of the approach. For example, a facial recognition algorithm may perform poorly when image resolution is low or images are taken in low lighting. Or a speech-to-text system might not be used reliably to provide closed captions for online lectures because it fails to handle technical jargon.
- The authors should discuss the computational efficiency of the proposed algorithms and how they scale with dataset size.
- If applicable, the authors should discuss possible limitations of their approach to address problems of privacy and fairness.
- While the authors might fear that complete honesty about limitations might be used by reviewers as grounds for rejection, a worse outcome might be that reviewers discover limitations that aren't acknowledged in the paper. The authors should use their best judgment and recognize that individual actions in favor of transparency play an important role in developing norms that preserve the integrity of the community. Reviewers will be specifically instructed to not penalize honesty concerning limitations.

### 3. Theory assumptions and proofs

Question: For each theoretical result, does the paper provide the full set of assumptions and a complete (and correct) proof?

Answer: [\[Yes\]](#)

Justification: Assumptions are given in theorem statements and proofs are provided in the appendix.

Guidelines:

- The answer NA means that the paper does not include theoretical results.
- All the theorems, formulas, and proofs in the paper should be numbered and cross-referenced.
- All assumptions should be clearly stated or referenced in the statement of any theorems.
- The proofs can either appear in the main paper or the supplemental material, but if they appear in the supplemental material, the authors are encouraged to provide a short proof sketch to provide intuition.
- Inversely, any informal proof provided in the core of the paper should be complemented by formal proofs provided in appendix or supplemental material.
- Theorems and Lemmas that the proof relies upon should be properly referenced.

#### 4. Experimental result reproducibility

Question: Does the paper fully disclose all the information needed to reproduce the main experimental results of the paper to the extent that it affects the main claims and/or conclusions of the paper (regardless of whether the code and data are provided or not)?

Answer: [\[Yes\]](#)

Justification: All necessary hyperparameters are listed in the appendix.

Guidelines:

- The answer NA means that the paper does not include experiments.
- If the paper includes experiments, a No answer to this question will not be perceived well by the reviewers: Making the paper reproducible is important, regardless of whether the code and data are provided or not.
- If the contribution is a dataset and/or model, the authors should describe the steps taken to make their results reproducible or verifiable.
- Depending on the contribution, reproducibility can be accomplished in various ways. For example, if the contribution is a novel architecture, describing the architecture fully might suffice, or if the contribution is a specific model and empirical evaluation, it may be necessary to either make it possible for others to replicate the model with the same dataset, or provide access to the model. In general, releasing code and data is often one good way to accomplish this, but reproducibility can also be provided via detailed instructions for how to replicate the results, access to a hosted model (e.g., in the case of a large language model), releasing of a model checkpoint, or other means that are appropriate to the research performed.
- While NeurIPS does not require releasing code, the conference does require all submissions to provide some reasonable avenue for reproducibility, which may depend on the nature of the contribution. For example
  - (a) If the contribution is primarily a new algorithm, the paper should make it clear how to reproduce that algorithm.
  - (b) If the contribution is primarily a new model architecture, the paper should describe the architecture clearly and fully.
  - (c) If the contribution is a new model (e.g., a large language model), then there should either be a way to access this model for reproducing the results or a way to reproduce the model (e.g., with an open-source dataset or instructions for how to construct the dataset).
  - (d) We recognize that reproducibility may be tricky in some cases, in which case authors are welcome to describe the particular way they provide for reproducibility. In the case of closed-source models, it may be that access to the model is limited in some way (e.g., to registered users), but it should be possible for other researchers to have some path to reproducing or verifying the results.

#### 5. Open access to data and code

Question: Does the paper provide open access to the data and code, with sufficient instructions to faithfully reproduce the main experimental results, as described in supplemental material?

Answer: [Yes]

Justification: Code is provided in SM and will be released publicly after the review period.

Guidelines:

- The answer NA means that paper does not include experiments requiring code.
- Please see the NeurIPS code and data submission guidelines (<https://nips.cc/public/guides/CodeSubmissionPolicy>) for more details.
- While we encourage the release of code and data, we understand that this might not be possible, so “No” is an acceptable answer. Papers cannot be rejected simply for not including code, unless this is central to the contribution (e.g., for a new open-source benchmark).
- The instructions should contain the exact command and environment needed to run to reproduce the results. See the NeurIPS code and data submission guidelines (<https://nips.cc/public/guides/CodeSubmissionPolicy>) for more details.
- The authors should provide instructions on data access and preparation, including how to access the raw data, preprocessed data, intermediate data, and generated data, etc.
- The authors should provide scripts to reproduce all experimental results for the new proposed method and baselines. If only a subset of experiments are reproducible, they should state which ones are omitted from the script and why.
- At submission time, to preserve anonymity, the authors should release anonymized versions (if applicable).
- Providing as much information as possible in supplemental material (appended to the paper) is recommended, but including URLs to data and code is permitted.

## 6. Experimental setting/details

Question: Does the paper specify all the training and test details (e.g., data splits, hyperparameters, how they were chosen, type of optimizer, etc.) necessary to understand the results?

Answer: [Yes]

Justification: These details are included in the appendix and relevant sections of the main body.

Guidelines:

- The answer NA means that the paper does not include experiments.
- The experimental setting should be presented in the core of the paper to a level of detail that is necessary to appreciate the results and make sense of them.
- The full details can be provided either with the code, in appendix, or as supplemental material.

## 7. Experiment statistical significance

Question: Does the paper report error bars suitably and correctly defined or other appropriate information about the statistical significance of the experiments?

Answer: [Yes]

Justification: Simulations are repeated 30 times for confidence, while empirical results are captured over 10 runs. Error bars are calculated using the seaborn library.

Guidelines:

- The answer NA means that the paper does not include experiments.
- The authors should answer "Yes" if the results are accompanied by error bars, confidence intervals, or statistical significance tests, at least for the experiments that support the main claims of the paper.
- The factors of variability that the error bars are capturing should be clearly stated (for example, train/test split, initialization, random drawing of some parameter, or overall run with given experimental conditions).

- The method for calculating the error bars should be explained (closed form formula, call to a library function, bootstrap, etc.)
- The assumptions made should be given (e.g., Normally distributed errors).
- It should be clear whether the error bar is the standard deviation or the standard error of the mean.
- It is OK to report 1-sigma error bars, but one should state it. The authors should preferably report a 2-sigma error bar than state that they have a 96% CI, if the hypothesis of Normality of errors is not verified.
- For asymmetric distributions, the authors should be careful not to show in tables or figures symmetric error bars that would yield results that are out of range (e.g. negative error rates).
- If error bars are reported in tables or plots, The authors should explain in the text how they were calculated and reference the corresponding figures or tables in the text.

## 8. Experiments compute resources

Question: For each experiment, does the paper provide sufficient information on the computer resources (type of compute workers, memory, time of execution) needed to reproduce the experiments?

Answer: [Yes]

Justification: Provided in appendix experimental details.

Guidelines:

- The answer NA means that the paper does not include experiments.
- The paper should indicate the type of compute workers CPU or GPU, internal cluster, or cloud provider, including relevant memory and storage.
- The paper should provide the amount of compute required for each of the individual experimental runs as well as estimate the total compute.
- The paper should disclose whether the full research project required more compute than the experiments reported in the paper (e.g., preliminary or failed experiments that didn't make it into the paper).

## 9. Code of ethics

Question: Does the research conducted in the paper conform, in every respect, with the NeurIPS Code of Ethics <https://neurips.cc/public/EthicsGuidelines>?

Answer: [Yes]

Justification: No human subjects, and potential harms are mentioned.

Guidelines:

- The answer NA means that the authors have not reviewed the NeurIPS Code of Ethics.
- If the authors answer No, they should explain the special circumstances that require a deviation from the Code of Ethics.
- The authors should make sure to preserve anonymity (e.g., if there is a special consideration due to laws or regulations in their jurisdiction).

## 10. Broader impacts

Question: Does the paper discuss both potential positive societal impacts and negative societal impacts of the work performed?

Answer: [Yes]

Justification: Mentioned in introduction and limitations.

Guidelines:

- The answer NA means that there is no societal impact of the work performed.
- If the authors answer NA or No, they should explain why their work has no societal impact or why the paper does not address societal impact.
- Examples of negative societal impacts include potential malicious or unintended uses (e.g., disinformation, generating fake profiles, surveillance), fairness considerations (e.g., deployment of technologies that could make decisions that unfairly impact specific groups), privacy considerations, and security considerations.



- The conference expects that many papers will be foundational research and not tied to particular applications, let alone deployments. However, if there is a direct path to any negative applications, the authors should point it out. For example, it is legitimate to point out that an improvement in the quality of generative models could be used to generate deepfakes for disinformation. On the other hand, it is not needed to point out that a generic algorithm for optimizing neural networks could enable people to train models that generate Deepfakes faster.
- The authors should consider possible harms that could arise when the technology is being used as intended and functioning correctly, harms that could arise when the technology is being used as intended but gives incorrect results, and harms following from (intentional or unintentional) misuse of the technology.
- If there are negative societal impacts, the authors could also discuss possible mitigation strategies (e.g., gated release of models, providing defenses in addition to attacks, mechanisms for monitoring misuse, mechanisms to monitor how a system learns from feedback over time, improving the efficiency and accessibility of ML).

## 11. Safeguards

Question: Does the paper describe safeguards that have been put in place for responsible release of data or models that have a high risk for misuse (e.g., pretrained language models, image generators, or scraped datasets)?

Answer: [NA]

Justification: No high risk models or data are released.

Guidelines:

- The answer NA means that the paper poses no such risks.
- Released models that have a high risk for misuse or dual-use should be released with necessary safeguards to allow for controlled use of the model, for example by requiring that users adhere to usage guidelines or restrictions to access the model or implementing safety filters.
- Datasets that have been scraped from the Internet could pose safety risks. The authors should describe how they avoided releasing unsafe images.
- We recognize that providing effective safeguards is challenging, and many papers do not require this, but we encourage authors to take this into account and make a best faith effort.

## 12. Licenses for existing assets

Question: Are the creators or original owners of assets (e.g., code, data, models), used in the paper, properly credited and are the license and terms of use explicitly mentioned and properly respected?

Answer: [Yes]

Justification: Datasets are cited and license is respected.

Guidelines:

- The answer NA means that the paper does not use existing assets.
- The authors should cite the original paper that produced the code package or dataset.
- The authors should state which version of the asset is used and, if possible, include a URL.
- The name of the license (e.g., CC-BY 4.0) should be included for each asset.
- For scraped data from a particular source (e.g., website), the copyright and terms of service of that source should be provided.
- If assets are released, the license, copyright information, and terms of use in the package should be provided. For popular datasets, [paperswithcode.com/datasets](https://paperswithcode.com/datasets) has curated licenses for some datasets. Their licensing guide can help determine the license of a dataset.
- For existing datasets that are re-packaged, both the original license and the license of the derived asset (if it has changed) should be provided.



613 • If this information is not available online, the authors are encouraged to reach out to  
614 the asset’s creators.

### 615 13. New assets

616 Question: Are new assets introduced in the paper well documented and is the documenta-  
617 tion provided alongside the assets?

618 Answer: [NA]

619 Justification: No new assets are released.

620 Guidelines:

- 621 • The answer NA means that the paper does not release new assets.
- 622 • Researchers should communicate the details of the dataset/code/model as part of their  
623 submissions via structured templates. This includes details about training, license,  
624 limitations, etc.
- 625 • The paper should discuss whether and how consent was obtained from people whose  
626 asset is used.
- 627 • At submission time, remember to anonymize your assets (if applicable). You can  
628 either create an anonymized URL or include an anonymized zip file.

### 629 14. Crowdsourcing and research with human subjects

630 Question: For crowdsourcing experiments and research with human subjects, does the pa-  
631 per include the full text of instructions given to participants and screenshots, if applicable,  
632 as well as details about compensation (if any)?

633 Answer: [NA]

634 Justification: No human subjects are utilized.

635 Guidelines:

- 636 • The answer NA means that the paper does not involve crowdsourcing nor research  
637 with human subjects.
- 638 • Including this information in the supplemental material is fine, but if the main contri-  
639 bution of the paper involves human subjects, then as much detail as possible should  
640 be included in the main paper.
- 641 • According to the NeurIPS Code of Ethics, workers involved in data collection, cura-  
642 tion, or other labor should be paid at least the minimum wage in the country of the  
643 data collector.

### 644 15. Institutional review board (IRB) approvals or equivalent for research with human 645 subjects

646 Question: Does the paper describe potential risks incurred by study participants, whether  
647 such risks were disclosed to the subjects, and whether Institutional Review Board (IRB)  
648 approvals (or an equivalent approval/review based on the requirements of your country or  
649 institution) were obtained?

650 Answer: [NA]

651 Justification: No human subjects are utilized.

652 Guidelines:

- 653 • The answer NA means that the paper does not involve crowdsourcing nor research  
654 with human subjects.
- 655 • Depending on the country in which research is conducted, IRB approval (or equiva-  
656 lent) may be required for any human subjects research. If you obtained IRB approval,  
657 you should clearly state this in the paper.
- 658 • We recognize that the procedures for this may vary significantly between institutions  
659 and locations, and we expect authors to adhere to the NeurIPS Code of Ethics and the  
660 guidelines for their institution.
- 661 • For initial submissions, do not include any information that would break anonymity  
662 (if applicable), such as the institution conducting the review.

### 663 16. Declaration of LLM usage

664 Question: Does the paper describe the usage of LLMs if it is an important, original, or  
665 non-standard component of the core methods in this research? Note that if the LLM is used  
666 only for writing, editing, or formatting purposes and does not impact the core methodology,  
667 scientific rigorousness, or originality of the research, declaration is not required.

668 Answer: [NA]

669 Justification: LLM usage is not non-standard.

670 Guidelines:

- 671 • The answer NA means that the core method development in this research does not
- 672 involve LLMs as any important, original, or non-standard components.
- 673 • Please refer to our LLM policy (<https://neurips.cc/Conferences/2025/LLM>)
- 674 for what should or should not be described.

## 675 A Proofs

### 676 A.1 Proof of Risk in (1)

677 *Proof.* Note we can decompose  $\mathbf{X}$  as

$$\underline{X} = y\underline{\mu} + \underline{Z}, \quad \underline{Z} \sim \mathcal{N}(0, \mathbf{I}_d) \quad (13)$$

678 or in matrix notation as

$$\mathbf{X} = y\underline{\mu}^\top + \mathbf{Z}, \quad \underline{Z}_i \sim \mathcal{N}(0, \mathbf{I}_d), i \in [n] \quad (14)$$

679 Then

$$\mathcal{R}_+ = \Pr(Y(\mathbf{X}^\top \underline{\theta} + b) < 0 | Y = 1) \quad (15)$$

$$= \Pr(\underline{\mu}^\top \underline{\theta} + \underline{Z}^\top \underline{\theta} + b < 0) \quad (16)$$

$$= \Pr(\underline{Z}^\top \underline{\theta} > \underline{\mu}^\top \underline{\theta} + b) \quad (17)$$

$$= \Pr(\|\underline{\theta}\| Z' > \underline{\mu}^\top \underline{\theta} + b) \quad (18)$$

$$= \Pr(Z' > \frac{\gamma^s}{\alpha} + \frac{b}{\alpha}) \quad (19)$$

$$= Q(\frac{\gamma^s}{\alpha} + \frac{b}{\alpha}) \quad (20)$$

680 where  $\underline{Z} \sim \mathcal{N}(\underline{0}, \mathbf{I})$  and  $Z' \sim \mathcal{N}(0, 1)$ .  $\square$

### 681 A.2 Technical Tool: CGMT

682 A key technical tool in this work is the convex Gaussian minimax theorem, and its predecessor  
683 Gordon's comparison lemma. We restate the key result here, but refer the reader to Thrampoulidis  
684 et al. [23] for a more detailed view on the problem.

685 Consider a pair of primary and auxiliary optimization problems:

$$\Phi(\mathbf{G}) \triangleq \min_{\underline{w} \in \mathcal{S}_w} \max_{\underline{u} \in \mathcal{S}_u} \underline{u}^\top \mathbf{G} \underline{w} + \psi(\underline{w}, \underline{u}), \quad (21)$$

$$\phi(\underline{g}, \underline{h}) \triangleq \max_{\underline{w} \in \mathcal{S}_w} \min_{\underline{u} \in \mathcal{S}_u} \|\underline{w}\|_2 \underline{g}^\top \underline{u} + \|\underline{u}\|_2 \underline{h}^\top \underline{w} + \psi(\underline{w}, \underline{u}). \quad (22)$$

686 We will show that for certain random inputs, these two problems are equivalent.

687 **Theorem 4** (CGMT [22]). *Let  $\Phi, \phi$  be defined as in (21) and (22),  $\mathbf{G}$  is a matrix with standard*  
688 *Gaussian entries, and  $\underline{G}, \underline{H} \sim \mathcal{N}(0, \mathbf{I})$ .*

$$\Pr(\Phi(\mathbf{G}) < c) \leq 2 \Pr(\phi(\underline{G}, \underline{H}) \leq c) \quad (23)$$

689 *additionally if  $\psi$  is convex-concave, then  $\forall c \in \mathbb{R}$*

$$\Pr(\Phi(\mathbf{G}) > c) \leq 2 \Pr(\phi(\underline{G}, \underline{H}) \geq c). \quad (24)$$

690 *That is, we can bound the performance of  $\Phi$  by the comparatively simpler  $\phi$ .*

691 We will leverage this result to study the comparatively simple auxiliary optimization problem  
692 through a series of scalarizations.

### 693 A.3 Properties of the Moreau Envelope

694 **Lemma 1** (Properties of Moreau). *Let  $\ell : \mathbb{R} \rightarrow \mathbb{R}$  be proper, closed, convex function. The Moreau*  
695 *envelope  $\mathcal{M}_\ell(x; \lambda)$  is jointly convex in its arguments and the following hold:*

$$\mathcal{M}'_{\ell,1}(x; \lambda) := \frac{x - \text{prox}_\ell(x; \lambda)}{\lambda}, \quad (25)$$

$$\mathcal{M}'_{\ell,2}(x; \lambda) := -\frac{1}{2} (\mathcal{M}'_{\ell,1}(x; \lambda))^2. \quad (26)$$

696 *For a complete list of useful properties see for example Lemma D.1 in [23].*

697 **A.4 Proof of Theorem 1**

698 Note that we can rewrite (4) by the constrained optimization problem

$$\begin{aligned} \min_{\underline{\theta}, \underline{b}} \quad & \frac{1}{n} \sum_{i=1}^n \omega_i \ell(u_i) \\ \text{s.t.} \quad & u_i = y_i(\underline{x}_i^\top \underline{\theta} + b) \quad \forall i \in [n] \end{aligned} \quad (27)$$

699 which then allows us to write the problem as a min-max:

$$\min_{\underline{\theta}, \underline{b}, \underline{u}} \max_{\underline{v}} \frac{1}{n} \sum_{i=1}^n v_i (u_i - y_i \underline{x}_i^\top \underline{\theta} - y_i b) + \omega_i \ell(u_i). \quad (28)$$

700 From this point, we can move to matrix notation

$$\min_{\underline{\theta}, \underline{b}, \underline{u}} \max_{\underline{v}} \frac{1}{n} \underline{v}^\top (\underline{u} - \underline{D}_y \underline{X} \underline{\theta} - \underline{y} b) + \mathcal{L}_\omega(\underline{u}), \quad (29)$$

701 where  $\mathcal{L}_\omega(\underline{u}) \triangleq \frac{1}{n} \sum_{i=1}^n \omega_i \ell(u_i)$  and  $\underline{D}_y$  is the diagonal matrix of the vector  $\underline{y}$ . We can further  
702 decompose this by expanding  $\underline{X}$  as

$$\min_{\underline{\theta}, \underline{b}, \underline{u}} \max_{\underline{v}} \frac{1}{n} [\underline{v}^\top \underline{u} - \underline{v}^\top \underline{D}_y (\underline{y} \underline{\mu}^\top - \underline{Z}) \underline{\theta} - \underline{v}^\top \underline{y} b] + \mathcal{L}_\omega(\underline{u}). \quad (30)$$

703 Finally, noting that  $\underline{D}_y \underline{y} = \underline{1}$ , we have the primary optimization:

$$\min_{\underline{\theta}, \underline{b}, \underline{u}} \max_{\underline{v}} \frac{1}{n} [\underline{v}^\top \underline{Z} \underline{\theta} - \underline{v}^\top \underline{1} (\underline{\mu}^\top \underline{\theta}) - \underline{v}^\top \underline{y} b + \underline{v}^\top \underline{u}] + \mathcal{L}_\omega(\underline{u}). \quad (\text{PO})$$

704 Next we write our auxiliary optimization following CGMT Theorem 4

$$\min_{\underline{\theta}, \underline{b}, \underline{u}} \max_{\underline{v}} \frac{1}{n} [\|\underline{\theta}\| \underline{g}^\top \underline{v} + \|\underline{v}\| \underline{h}^\top \underline{\theta} + \underline{v}^\top \underline{u} - \underline{v}^\top \underline{1} (\underline{\mu}^\top \underline{\theta}) - \underline{v}^\top \underline{y} b] + \mathcal{L}_\omega(\underline{u}). \quad (\text{AO})$$

705 We can separately optimize over the direction and magnitude of  $\underline{v}$ :

$$\min_{\underline{\theta}, \underline{b}, \underline{u}} \max_{\beta \geq 0, \|\underline{v}\| = \beta} \frac{1}{n} [\|\underline{\theta}\| \underline{g}^\top \underline{v} + \beta \underline{h}^\top \underline{\theta} + \underline{v}^\top \underline{u} - \underline{v}^\top \underline{1} (\underline{\mu}^\top \underline{\theta}) - \underline{v}^\top \underline{y} b] + \mathcal{L}_\omega(\underline{u}) \quad (31)$$

$$\min_{\underline{\theta}, \underline{b}, \underline{u}} \max_{\beta \geq 0, \|\underline{v}\| = \beta} \frac{1}{n} [\underline{v}^\top (\|\underline{\theta}\| \underline{g} + \underline{u} - \underline{1} (\underline{\mu}^\top \underline{\theta}) - \underline{y} b) + \beta \underline{h}^\top \underline{\theta}] + \mathcal{L}_\omega(\underline{u}) \quad (32)$$

$$\min_{\underline{\theta}, \underline{b}, \underline{u}} \max_{\beta \geq 0} \frac{1}{n} [\beta \|\underline{u} + \|\underline{\theta}\| \underline{g} - \underline{1} (\underline{\mu}^\top \underline{\theta}) - \underline{y} b\| + \beta \underline{h}^\top \underline{\theta}] + \mathcal{L}_\omega(\underline{u}). \quad (33)$$

706 Next we use the AM-GM trick<sup>1</sup> to rewrite the two norm as the squared two norm, letting  $\xi = \frac{\beta}{\sqrt{n}}$ :

$$\min_{\underline{\theta}, \underline{b}, \underline{u}} \max_{\xi \geq 0} \min_{\tau > 0} \frac{\xi \tau}{2} + \frac{\xi}{2\tau n} \|\underline{u} + \|\underline{\theta}\| \underline{g} - \underline{1} (\underline{\mu}^\top \underline{\theta}) - \underline{y} b\|^2 + \frac{\xi}{\sqrt{n}} \underline{h}^\top \underline{\theta} + \mathcal{L}_\omega(\underline{u}) \quad (34)$$

707 Now we optimize  $\underline{\theta}$  in the orthogonal subspace to  $\underline{\mu}$  setting  $\|\underline{\theta}\| = \alpha$  and  $\frac{\underline{\theta}^\top \underline{\mu}}{\|\underline{\mu}\|} = \gamma$ <sup>2</sup>:

$$\begin{aligned} \min_{\alpha, \beta, \gamma \leq \alpha, u} \max_{\xi \geq 0} \min_{\tau > 0} \frac{\xi \tau}{2} + \frac{\xi}{2\tau n} \|\underline{u} + \alpha \underline{g} - \underline{1} (\|\underline{\mu}\| \gamma) - \underline{y} b\|^2 \\ - \frac{\xi}{\sqrt{n}} (\underline{h}^\top \underline{\mu} \frac{\gamma}{\|\underline{\mu}\|} + \sqrt{\alpha^2 - \gamma^2} \|\underline{P}^\perp \underline{h}\|) + \mathcal{L}_\omega(\underline{u}) \end{aligned} \quad (35)$$

---

<sup>1</sup>  $\frac{x}{\sqrt{n}} = \min_{\tau > 0} \frac{\tau}{2} + \frac{x^2}{2\tau}$

<sup>2</sup>  $\underline{\theta} = \frac{(\underline{\mu}^\top \underline{\theta})}{\|\underline{\mu}\|} \frac{\underline{\mu}}{\|\underline{\mu}\|} + \underline{P}^\perp \underline{\theta} \Rightarrow \|\underline{\theta}\|^2 = (\frac{(\underline{\mu}^\top \underline{\theta})}{\|\underline{\mu}\|})^2 + \|\underline{P}^\perp \underline{\theta}\|^2 \Rightarrow \|\underline{P}^\perp \underline{\theta}\| = \sqrt{\alpha^2 - \gamma^2}$

708 where  $\mathbf{P}^\perp$  projection into the orthogonal subspace of  $\underline{\mu}$ . This can then be written in terms of the  
 709 Moreau envelope:

$$\begin{aligned} & \min_{\alpha, b, \gamma \leq \alpha} \max_{\xi \geq 0} \min_{\tau > 0} \frac{\xi \tau}{2} - \frac{\xi}{\sqrt{n}} (\underline{h}^\top \underline{\mu} \frac{\gamma}{\|\underline{\mu}\|} + \sqrt{\alpha^2 - \gamma^2} \|\mathbf{P}^\perp \underline{h}\|) \\ & + \frac{1}{n} \left[ \sum_{i=1}^{n_+} \omega_+ \mathcal{M}(-\alpha g_i + \|\underline{\mu}\| \gamma + b; \frac{\tau \omega_+}{\xi}) \right. \\ & \left. + \sum_{j=1}^{n_-} \omega_- \mathcal{M}(-\alpha g_j + \|\underline{\mu}\| \gamma - b; \frac{\tau \omega_-}{\xi}) \right]. \end{aligned} \quad (36)$$

710 where we have grouped by  $\underline{y}$ . Letting  $n, d \rightarrow \infty$  with  $\frac{d}{n} = \delta$ , we have

$$\begin{aligned} & \min_{\alpha > 0, b, \gamma \leq \alpha, \tau > 0} \max_{\xi \geq 0} \frac{\xi \tau}{2} - \xi \sqrt{\delta(\alpha^2 - \gamma^2)} + \pi_+ \omega_+ \mathbb{E}[\mathcal{M}(-\alpha G + \|\underline{\mu}\| \gamma + b; \frac{\tau \omega_+}{\xi})] \\ & + \pi_- \omega_- \mathbb{E}[\mathcal{M}(-\alpha G + \|\underline{\mu}\| \gamma - b; \frac{\tau \omega_-}{\xi})]. \end{aligned} \quad (37)$$

711 where we have switched the order of the min and max. See Taheri et al. [29] for a justification and  
 712 further technical details.

713 This leaves us with a simplified systems of equations to solve based on first-order optimality condi-  
 714 tions:

$$\begin{aligned} & \frac{\xi}{2} + \pi_+ \frac{\omega_+^2}{\xi} \mathbb{E}[\mathcal{M}'_{\ell,2}(-\alpha G + \|\underline{\mu}\| \gamma + b; \frac{\tau \omega_+}{\xi})] \\ & + \pi_- \frac{\omega_-^2}{\xi} \mathbb{E}[\mathcal{M}'_{\ell,2}(-\alpha G + \|\underline{\mu}\| \gamma - b; \frac{\tau \omega_-}{\xi})] = 0 \end{aligned} \quad (38a)$$

$$\begin{aligned} & \frac{\tau}{2} - \sqrt{\delta(\alpha^2 - \gamma^2)} - \pi_+ \frac{\tau \omega_+^2}{\xi^2} \mathbb{E}[\mathcal{M}'_{\ell,2}(-\alpha G + \|\underline{\mu}\| \gamma + b; \frac{\tau \omega_+}{\xi})] \\ & - \pi_- \frac{\tau \omega_-^2}{\xi^2} \mathbb{E}[\mathcal{M}'_{\ell,2}(-\alpha G + \|\underline{\mu}\| \gamma - b; \frac{\tau \omega_-}{\xi})] = 0 \end{aligned} \quad (38b)$$

$$\begin{aligned} & \xi \frac{\delta \gamma}{\sqrt{\delta(\alpha^2 - \gamma^2)}} + \pi_+ \omega_+ \|\underline{\mu}\| \mathbb{E}[\mathcal{M}'_{\ell,1}(-\alpha G + \|\underline{\mu}\| \gamma + b; \frac{\tau \omega_+}{\xi})] \\ & + \pi_- \omega_- \|\underline{\mu}\| \mathbb{E}[\mathcal{M}'_{\ell,1}(-\alpha G + \|\underline{\mu}\| \gamma - b; \frac{\tau \omega_-}{\xi})] = 0 \end{aligned} \quad (38c)$$

$$\begin{aligned} & \pi_+ \omega_+ \mathbb{E}[\mathcal{M}'_{\ell,1}(-\alpha G + \|\underline{\mu}\| \gamma + b; \frac{\tau \omega_+}{\xi})] \\ & - \pi_- \omega_- \mathbb{E}[\mathcal{M}'_{\ell,1}(-\alpha G + \|\underline{\mu}\| \gamma - b; \frac{\tau \omega_-}{\xi})] = 0 \end{aligned} \quad (38d)$$

$$\begin{aligned} & -\xi \frac{\delta \alpha}{\sqrt{\delta(\alpha^2 - \gamma^2)}} - \pi_+ \omega_+ \mathbb{E}[G \mathcal{M}'_{\ell,1}(-\alpha G + \|\underline{\mu}\| \gamma + b; \frac{\tau \omega_+}{\xi})] \\ & - \pi_- \omega_- \mathbb{E}[G \mathcal{M}'_{\ell,1}(-\alpha G + \|\underline{\mu}\| \gamma - b; \frac{\tau \omega_-}{\xi})] = 0 \end{aligned} \quad (38e)$$

715 Let  $\lambda' \triangleq \tau/\xi$ . Combining (38a) and (38b) we obtain  $\tau = \sqrt{\delta(\alpha^2 - \gamma^2)}$ , equivalently, we have  
 716  $\xi = \sqrt{\delta(\alpha^2 - \gamma^2)}/\lambda'$ . Substituting this into (38c) and (38e) we see the following simplifications:

$$\begin{aligned} & \delta(\alpha^2 - \gamma^2) + 2\lambda'^2 \pi_+ \omega_+^2 \mathbb{E}[\mathcal{M}'_{\ell,2}(-\alpha G + \|\underline{\mu}\| \gamma + b; \lambda' \omega_+)] \\ & + 2\lambda'^2 \pi_- \omega_-^2 \mathbb{E}[\mathcal{M}'_{\ell,2}(-\alpha G + \|\underline{\mu}\| \gamma - b; \lambda' \omega_-)] = 0 \end{aligned} \quad (39a)$$

$$\begin{aligned} & \frac{\delta \gamma}{\lambda'} + \pi_+ \omega_+ \|\underline{\mu}\| \mathbb{E}[\mathcal{M}'_{\ell,1}(-\alpha G + \|\underline{\mu}\| \gamma + b; \lambda' \omega_+)] \\ & + \pi_- \omega_- \|\underline{\mu}\| \mathbb{E}[\mathcal{M}'_{\ell,1}(-\alpha G + \|\underline{\mu}\| \gamma - b; \lambda' \omega_-)] = 0 \end{aligned} \quad (39b)$$

$$-\frac{\delta \alpha}{\lambda'} - \pi_+ \omega_+ \mathbb{E}[G \mathcal{M}'_{\ell,1}(-\alpha G + \|\underline{\mu}\| \gamma + b; \lambda' \omega_+)]$$

$$-\pi_- \omega_- \mathbb{E}[G \mathcal{M}'_{\ell,1}(-\alpha G + \|\underline{\mu}\| \gamma - b; \lambda' \omega_-)] = 0 \quad (39c)$$

$$\begin{aligned} & \pi_+ \omega_+ \mathbb{E}[\mathcal{M}'_{\ell,1}(-\alpha G + \|\underline{\mu}\| \gamma + b; \lambda' \omega_+)] \\ & - \pi_- \omega_- \mathbb{E}[\mathcal{M}'_{\ell,1}(-\alpha G + \|\underline{\mu}\| \gamma - b; \lambda' \omega_-)] = 0 \end{aligned} \quad (39d)$$

717 Note that the above depends only on the ratio of the weights, so let  $\lambda \triangleq \lambda' \omega_+$  and  $\rho \triangleq \frac{\omega_+}{\omega_-}$ ,

$$\begin{aligned} & \delta(\alpha^2 - \gamma^2) + 2\lambda^2 \pi_+ \mathbb{E}[\mathcal{M}'_{\ell,2}(-\alpha G + \|\underline{\mu}\| \gamma + b; \lambda)] \\ & + 2\frac{\lambda^2}{\rho^2} \pi_- \mathbb{E}[\mathcal{M}'_{\ell,2}(-\alpha G + \|\underline{\mu}\| \gamma - b; \lambda/\rho)] = 0 \end{aligned} \quad (40a)$$

$$\begin{aligned} & \frac{\delta\gamma\rho}{\lambda} + \pi_+ \rho \|\underline{\mu}\| \mathbb{E}[\mathcal{M}'_{\ell,1}(-\alpha G + \|\underline{\mu}\| \gamma + b; \lambda)] \\ & + \pi_- \|\underline{\mu}\| \mathbb{E}[\mathcal{M}'_{\ell,1}(-\alpha G + \|\underline{\mu}\| \gamma - b; \lambda/\rho)] = 0 \end{aligned} \quad (40b)$$

$$\begin{aligned} & -\frac{\delta\alpha\rho}{\lambda} - \pi_+ \rho \mathbb{E}[G \mathcal{M}'_{\ell,1}(-\alpha G + \|\underline{\mu}\| \gamma + b; \lambda)] \\ & - \pi_- \mathbb{E}[G \mathcal{M}'_{\ell,1}(-\alpha G + \|\underline{\mu}\| \gamma - b; \lambda/\rho)] = 0 \end{aligned} \quad (40c)$$

$$\begin{aligned} & \pi_+ \rho \mathbb{E}[\mathcal{M}'_{\ell,1}(-\alpha G + \|\underline{\mu}\| \gamma + b; \lambda)] \\ & - \pi_- \mathbb{E}[\mathcal{M}'_{\ell,1}(-\alpha G + \|\underline{\mu}\| \gamma - b; \lambda/\rho)] = 0 \end{aligned} \quad (40d)$$

718 We can rewrite using Stein's lemma<sup>3</sup>:

$$\begin{aligned} & \delta(\alpha^2 - \gamma^2) + 2\lambda^2 \pi_+ \mathbb{E}[\mathcal{M}'_{\ell,2}(-\alpha G + \|\underline{\mu}\| \gamma + b; \lambda)] \\ & + 2\lambda^2 / \rho^2 \pi_- \mathbb{E}[\mathcal{M}'_{\ell,2}(-\alpha G + \|\underline{\mu}\| \gamma - b; \lambda/\rho)] = 0 \end{aligned} \quad (41a)$$

$$\begin{aligned} & \frac{\delta\gamma\rho}{\lambda} + \pi_+ \rho \|\underline{\mu}\| \mathbb{E}[\mathcal{M}'_{\ell,1}(-\alpha G + \|\underline{\mu}\| \gamma + b; \lambda)] \\ & + \pi_- \|\underline{\mu}\| \mathbb{E}[\mathcal{M}'_{\ell,1}(-\alpha G + \|\underline{\mu}\| \gamma - b; \lambda/\rho)] = 0 \end{aligned} \quad (41b)$$

$$\begin{aligned} & -\frac{\delta\alpha\rho}{\lambda} + \pi_+ \rho \alpha \mathbb{E}[\mathcal{M}''_{\ell,1}(-\alpha G + \|\underline{\mu}\| \gamma + b; \lambda)] \\ & + \pi_- \alpha \mathbb{E}[\mathcal{M}''_{\ell,1}(-\alpha G + \|\underline{\mu}\| \gamma - b; \lambda/\rho)] = 0 \end{aligned} \quad (41c)$$

$$\begin{aligned} & \pi_+ \rho \mathbb{E}[\mathcal{M}'_{\ell,1}(-\alpha G + \|\underline{\mu}\| \gamma + b; \lambda)] \\ & - \pi_- \mathbb{E}[\mathcal{M}'_{\ell,1}(-\alpha G + \|\underline{\mu}\| \gamma - b; \lambda/\rho)] = 0 \end{aligned} \quad (41d)$$

719 This completes the proof.

## 720 A.5 Proof of Corollary 1

721 The margin-based form of square loss can be written as

$$\ell_{\text{square}}(z) \triangleq \frac{1}{2}(z - 1)^2 \quad (42)$$

722 where  $z$  is the margin. The prox operator (and therefore the Moreau envelope) has a nice form for  
723 this loss:

$$\text{prox}_{\ell_{\text{square}}}(x; \lambda) = \frac{x + \lambda}{1 + \lambda} \quad (43)$$

724 which thus reduces the Moreau envelope to

$$\mathcal{M}_{\ell_{\text{square}}}(x; \lambda) = \frac{1}{2} \left( \frac{x + \lambda}{1 + \lambda} - 1 \right)^2 + \frac{1}{2\lambda} \left( \frac{\lambda(1 - x)}{1 + \lambda} \right)^2 \quad (44a)$$

$$= \frac{1}{2} \frac{(x - 1)^2}{(1 + \lambda)^2} + \frac{\lambda(1 - x)^2}{2(1 + \lambda)^2} \quad (44b)$$

$$= \frac{1}{2} \frac{(x - 1)^2}{1 + \lambda} \quad (44c)$$

---

<sup>3</sup>For smooth function  $f$  and  $G$  standard normal:  $\mathbb{E}[Gf(G)] = \mathbb{E}[f'(G)]$  and  $\mathbb{E}[Gf(\alpha G)] = \alpha \mathbb{E}[f'(\alpha G)]$

725 We have the following derivatives of the Moreau envelope:

$$\mathcal{M}'_{\ell,1}(x; \lambda) := \frac{x-1}{1+\lambda} \quad (45)$$

$$\mathcal{M}''_{\ell,1}(x; \lambda) := \frac{1}{1+\lambda} \quad (46)$$

$$\mathcal{M}'_{\ell,2}(x; \lambda) := \frac{-(x-1)^2}{2(1+\lambda)^2} \quad (47)$$

726 Using the properties of the Moreau envelope of square loss, we get the following from (41):

$$\begin{aligned} & \delta(\alpha^2 - \gamma^2) + \lambda^2 \pi_+ \frac{-\mathbb{E}[(-\alpha G + \|\underline{\mu}\| \gamma + b - 1)^2]}{(1+\lambda)^2} \\ & + \lambda^2 / \rho^2 \pi_- \frac{-\mathbb{E}[(-\alpha G + \|\underline{\mu}\| \gamma - b - 1)^2]}{(1+\lambda/\rho)^2} = 0 \end{aligned} \quad (48a)$$

$$\begin{aligned} & \frac{\delta\gamma\rho}{\lambda} + \pi_+ \rho \|\underline{\mu}\| \frac{\mathbb{E}[(-\alpha G + \|\underline{\mu}\| \gamma + b - 1)]}{1+\lambda} \\ & + \pi_- \|\underline{\mu}\| \frac{\mathbb{E}[(-\alpha G + \|\underline{\mu}\| \gamma - b - 1)]}{1+\lambda/\rho} = 0 \end{aligned} \quad (48b)$$

$$-\frac{\delta\alpha\rho}{\lambda} + \pi_+ \alpha \rho \frac{1}{1+\lambda} + \pi_- \alpha \frac{1}{1+\lambda/\rho} = 0 \quad (48c)$$

$$\begin{aligned} & \pi_+ \rho \frac{\mathbb{E}[(-\alpha G + \|\underline{\mu}\| \gamma + b - 1)]}{1+\lambda} \\ & - \pi_- \frac{\mathbb{E}[(-\alpha G + \|\underline{\mu}\| \gamma - b - 1)]}{1+\lambda/\rho} = 0 \end{aligned} \quad (48d)$$

727 Taking the expectations, we get

$$\begin{aligned} & \delta(\alpha^2 - \gamma^2) - \lambda^2 \pi_+ \frac{2b\gamma\|\underline{\mu}\| + \gamma^2\|\underline{\mu}\|^2 - 2\gamma\|\underline{\mu}\| + b^2 - 2b + \alpha^2 + 1}{(1+\lambda)^2} \\ & - \lambda^2 / \rho^2 \pi_- \frac{-2b\gamma\|\underline{\mu}\| + \gamma^2\|\underline{\mu}\|^2 - 2\gamma\|\underline{\mu}\| + b^2 + 2b + \alpha^2 + 1}{(1+\lambda/\rho)^2} = 0 \end{aligned} \quad (49a)$$

$$\frac{\delta\gamma\rho}{\lambda} + \pi_+ \rho \|\underline{\mu}\| \frac{\|\underline{\mu}\| \gamma + b - 1}{1+\lambda} + \pi_- \|\underline{\mu}\| \frac{\|\underline{\mu}\| \gamma - b - 1}{1+\lambda/\rho} = 0 \quad (49b)$$

$$-\frac{\delta\rho}{\lambda} + \pi_+ \rho \frac{1}{1+\lambda} + \pi_- \frac{1}{1+\lambda/\rho} = 0 \quad (49c)$$

$$\pi_+ \rho \frac{\|\underline{\mu}\| \gamma + b - 1}{1+\lambda} - \pi_- \frac{\|\underline{\mu}\| \gamma - b - 1}{1+\lambda/\rho} = 0 \quad (49d)$$

728 This proves Corollary 1.

## 729 A.6 Comparison of $\rho = 1$ and $\tilde{\rho}$

730 Note that we have closed forms for both the unweighted case (Corollary 2) and the weighted case  
731 such that  $b^* = 0$  (Theorem 2). Thus, it is natural to compare the two to see when it is advantageous  
732 to weight in this manner.

733 In the unweighted case, the WCE is dominated by the positive (minority) risk in (1) since  $b^* < 0$ . On  
734 the other hand, the two class-conditional risks are equal for the model learned with  $\tilde{\rho}$  by construction.  
735 Thus, we need not consider the max in the definition of WCE (2). The comparison of interest, then,  
736 is simply two  $Q$  functions. We will derive conditions under which  $\tilde{\rho}$  achieves lower WCE than  
737  $\rho = 1$ . We denote the solution to the weighted problem as  $(\tilde{\gamma}, \tilde{\alpha})$  and the unweighted problem as  
738  $(\gamma^*, \alpha^*, b^*)$ . Thus, in order for the  $\tilde{\rho}$ -reweighted WCE to be lower than the unweighted WCE,

$$Q\left(\frac{\tilde{\gamma}s}{\tilde{\alpha}}\right) \leq Q\left(\frac{\gamma^*s + b^*}{\alpha^*}\right), \quad (50)$$

739 requiring

$$\frac{\tilde{\gamma}s}{\tilde{\alpha}} \geq \frac{\gamma^*s + b^*}{\alpha^*}. \quad (51)$$

740 Substituting the closed-form solutions yields the following necessary and sufficient condition:

$$s^2 \leq \frac{1 - 2\pi_+}{2 \left( 2\pi_+(1 - \pi_+) - \sqrt{\frac{(1 - \pi_+)\pi_+(4(1 - \pi_+)\pi_+ - \delta)}{1 - \delta}} \right)} \quad (52)$$

741 This final expression demonstrates that if the separation of the classes is too large, then the un-  
 742 weighted model will outperform the weighted model. This is perhaps intuitive given that large  
 743 separations essentially act as leverage, possibly causing the weights to overcorrect. Note that in this  
 744 large separation regime,  $\frac{\tilde{\gamma}s}{\tilde{\alpha}}$  is approximately linear and so the WCE of the weighted model decays  
 745 exponentially in  $s$ . This tells us that when  $\tilde{\rho}$  is outperformed by  $\rho = 1$ , the errors are very small.

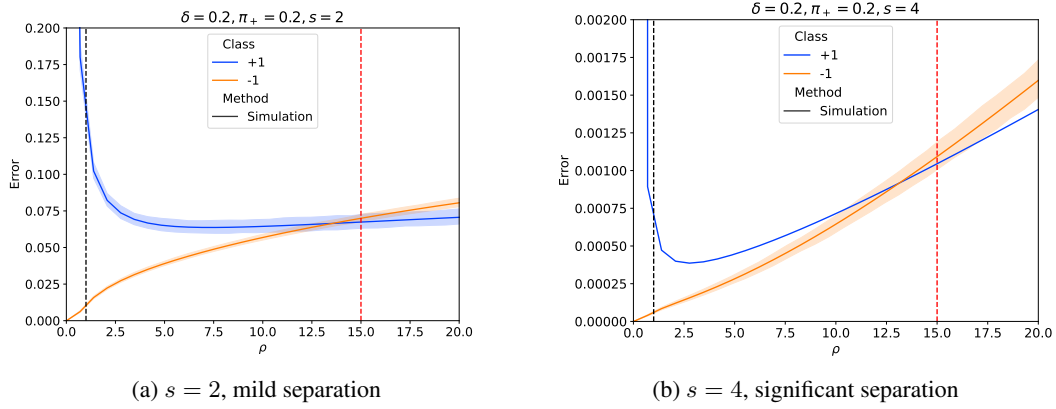

Figure 8: With mild separation, the weighted model (red) does significantly better than the un-weighted model (black), but this is reversed with large separation between classes. Note the difference in scales of the error.

746 See Figure 8 to understand the behavior of the class-conditional risks with increasing separation.  
 747 In Figure 8b, note that  $\tilde{\rho}$  is predictive of the crossover point, but that the weight where the WCE is  
 748 actually minimized is smaller than  $\tilde{\rho}$  in the large separation case. This result provides clear insight  
 749 into the regions where weighting is useful and emphasizes the intuitive point that larger separations  
 750 demand less weighting. Indeed we see that increasing separation decreases the errors for each class  
 751 while also decreasing the optimal weight; we conjecture that for  $s \rightarrow \infty$ , the optimal weight will  
 752 decrease from  $\tilde{\rho}$  to 1. This regime is of little impact, however, as the error for both will be extremely  
 753 small as pointed out previously.



## 754 B Additional Plots

### 755 B.1 PCA

756 We see in Figure 9 that very few features capture most of the variance of the retraining data. This  
 757 motivates us to use the smaller “effective” dimension as mentioned in the main body. Note that for  
 CIFAR10, the limited data limits the maximum number of meaningful features.

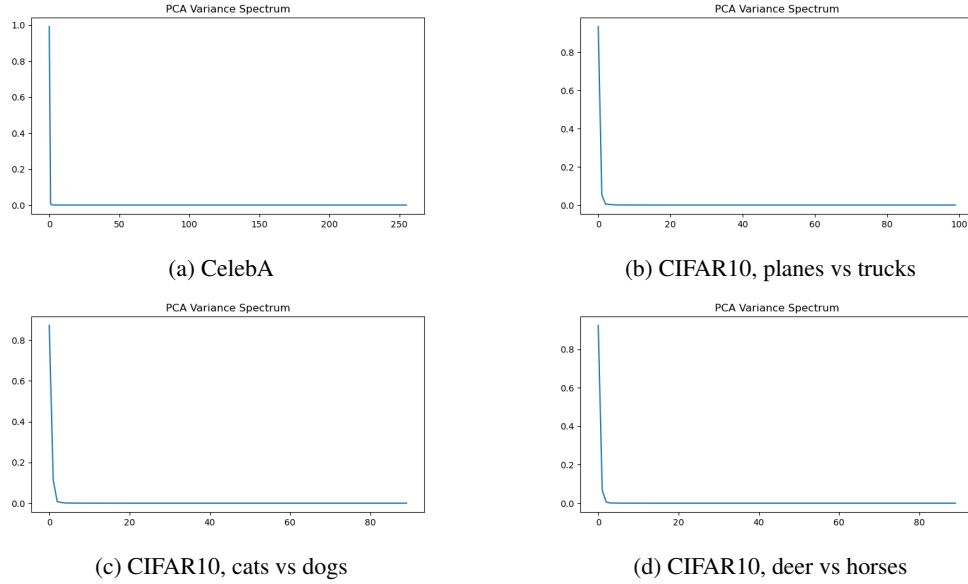

Figure 9: PCA Spectra. We see that most of the variance is captured by very few features.

758

### 759 B.2 Ablation Studies

760 We provide additional plots in Figure 10 showing that our findings hold even when the latent di-  
 761 mension of the ResNet34 model is different. Here we show results for a ResNet34 model with 128  
 dimensional latent space. The effective dimension (3) is still used to calculate  $\tilde{\rho}$ .

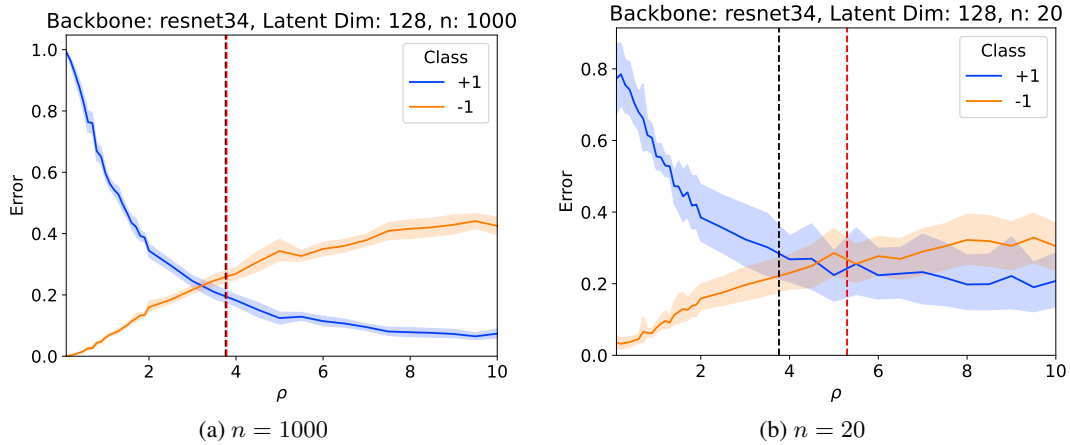

Figure 10: Per-class errors on CelebA dataset. Even with a lower latent dimension,  $\tilde{\rho}$  (red) is still predictive of the cross-over point modulo a shift seen even in the large  $n$  setting. This is likely due to non-Gaussianity of the latent data.

762

Even for different class pairs in CIFAR10, we see similar behavior as shown in Figure 11. For this dataset, we select cat as the minority class +1 and dog as the majority class -1. The imbalance is selected as 17% class +1 and 83% class -1. For this dataset, the effective dimension is 3.  $\tilde{\rho}$  is still predictive of the crossover point for both  $n = 90$  and  $n = 20$  resulting in significant gains over the traditional ratio of priors.

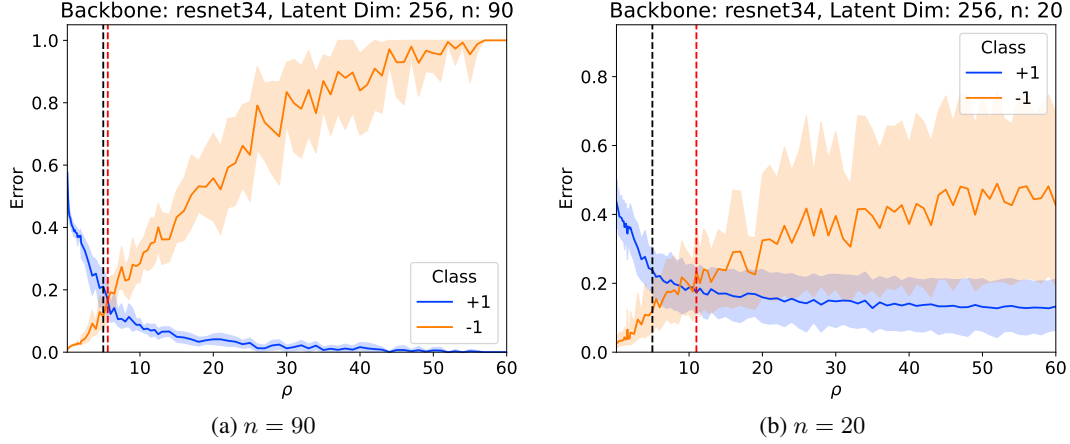

Figure 11: Per-class errors on CIFAR10 dataset, cats vs dogs.  $\tilde{\rho}$  (red) is predictive of the cross-over point when using the effective dimension of the data (4).

767

The story is similar for deer vs horse with the same imbalance which has effective dimension 9. Note that for  $n = 20$ ,  $\tilde{\rho}$  is undefined, suggesting that the correct weighting strategy is to push  $\rho \rightarrow \infty$ . We see that up to  $\rho = 60$ , the per-class errors do not meet.

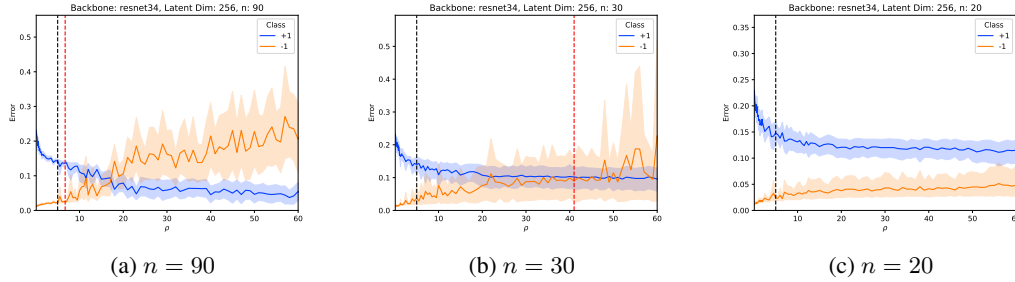

Figure 12: Per-class errors on CIFAR10 dataset, deer vs horses.  $\tilde{\rho}$  (red) is predictive of the cross-over point when it is defined using the effective dimension of the data (9). It is undefined for  $n = 20$ , suggesting that the per-class risks will not meet. This effect is seen in practice.

## 771 C Experimental Details

All empirical experiments were performed using NVIDIA A100 GPUs while simulations were completed on CPU. Each experiment took less than 30 minutes of wall time to run after training base models. Base models took less than 4 hours to finetune from the pretrained weights. A full list of hyperparameters is provided in Table 1.

| Parameter               | Value           |
|-------------------------|-----------------|
| Backbone                | ResNet34        |
| Pretrained Weights      | Imagenet1k-V2   |
| Latent Dimension        | {128, 256, 512} |
| Optimizer               | AdamW           |
| Learning Rate           | 1e-3            |
| Full fine-tuning epochs | 10              |
| MLP Dropout Rate        | 0.5             |
| Fine-tuning epochs      | 30              |
| Fine-tuning LR          | 1e-2            |

Table 1: Hyperparameters for CelebA and CIFAR10
